# Supplementary material for: LIM kinase inhibitors disrupt mitotic microtubule organization and impair tumor cell proliferation
Source: PubMed Central journal article supplement (PMC4770715; doi:10.18632/oncotarget.6288), 2015-11-03
Supplement: oncotarget-06-38469-s002.pdf [file oncotarget-06-38469-s002.pdf]

| Supplier Ref | Formatted ID | pXC50 Mo | REL pXC50 | ABS XC50 | Min | Max | Hillslope | R2      | Condition | Graph                                                                                 | XC50 M | REL pXC50 | ABS XC50 | Min | Max | Hillslope | R2     | Condition | Graph                                                                                 |
|--------------|--------------|----------|-----------|----------|-----|-----|-----------|---------|-----------|---------------------------------------------------------------------------------------|--------|-----------|----------|-----|-----|-----------|--------|-----------|---------------------------------------------------------------------------------------|
| GW644007X    | BDP-00006356 | =        | 5.4629    | 3.444348 | 0   | 100 | -19.211   | 0.7391  | +DMSO     | 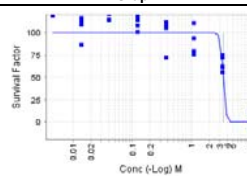   | =      | 5.7372    | 1.831313 | 0   | 100 | -1.7504   | 0.841  | +LIMK     |    |
| SB-361058    | BDP-00006189 | <        | 5         | <5       | 0   | 100 | -11.359   | -0.1176 | +DMSO     |    | =      | 5.0565    | 8.780325 | 0   | 100 | -21.883   | 0.7905 | +LIMK     |    |
| SB-735467    | BDP-00006207 | <        | 5         | <5       | 0   | 100 | -506.3    | -0.0717 | +DMSO     |    | =      | 5.0589    | 8.730894 | 0   | 100 | -1.9054   | 0.622  | +LIMK     |    |
| GSK317315A   | BDP-00006258 | =        | 7.0217    | 0.095129 | 0   | 100 | -1.9964   | 0.772   | +DMSO     |    | v      | 8.3372    | >8.3372  | 0   | 100 | -0.5818   | 0.4853 | +LIMK     |    |
| GSK1220512A  | BDP-00006280 | =        | 7.9618    | 0.01092  | 0   | 100 | -1.5915   | 0.7838  | +DMSO     |   | v      | 8.3372    | >8.3372  | 0   | 100 | -1.0279   | 0.6488 | +LIMK     |   |
| GW830263A    | BDP-00006298 | <        | 5         | <5       | 0   | 100 | -0.7309   | 0.0298  | +DMSO     |  | =      | 5.25      | 5.623925 | 0   | 100 | -1.9496   | 0.7642 | +LIMK     |  |
| GW701427A    | BDP-00006313 | <        | 5         | <5       | 0   | 100 | -1.3694   | 0.0953  | +DMSO     |  | =      | 5.4174    | 3.825115 | 0   | 100 | -1.9217   | 0.7433 | +LIMK     |  |

|             |              |   |        |         |   |     |         |         |       |                                                                                       |  |        |          |   |     |         |        |       |                                                                                       |
|-------------|--------------|---|--------|---------|---|-----|---------|---------|-------|---------------------------------------------------------------------------------------|--|--------|----------|---|-----|---------|--------|-------|---------------------------------------------------------------------------------------|
| GSK1023156A | BDP-00006315 | < | 5      | <5      | 0 | 100 | -0.7882 | 0.2991  | +DMSO | 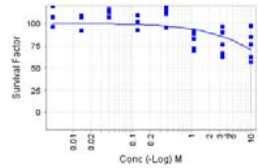   |  | 6.2458 | 0.567816 | 0 | 100 | -2.8356 | 0.898  | +LIMK |    |
| GSK1030058A | BDP-00006316 | < | 5      | <5      | 0 | 100 | -11.562 | 0.0106  | +DMSO |    |  | 5.0912 | 8.10592  | 0 | 100 | -1.7247 | 0.5011 | +LIMK |    |
| GW853606X   | BDP-00006323 | < | 5      | <5      | 0 | 100 | -0.6023 | 0.134   | +DMSO |    |  | 5.7373 | 1.83123  | 0 | 100 | -1.332  | 0.7739 | +LIMK |    |
| GSK619487A  | BDP-00006332 | < | 5      | <5      | 0 | 100 | -0.2794 | 0.1411  | +DMSO |    |  | 5.8051 | 1.566427 | 0 | 100 | -0.9437 | 0.8773 | +LIMK |    |
| GW827106X   | BDP-00006376 | > | 8.3372 | >8.3372 | 0 | 100 | 2.0386  | -0.6498 | +DMSO |   |  | 5.3654 | 4.311181 | 0 | 100 | -1.9301 | 0.6222 | +LIMK |   |
| GW829906X   | BDP-00006382 | < | 5      | <5      | 0 | 100 | -363    | -0.234  | +DMSO |  |  | 5.29   | 5.128767 | 0 | 100 | -1.7586 | 0.56   | +LIMK |  |
| GW574783B   | BDP-00006391 | < | 5      | <5      | 0 | 100 | -212.58 | -0.4842 | +DMSO |  |  | 5.1013 | 7.919524 | 0 | 100 | -2.0802 | 0.7543 | +LIMK |  |

|               |              |   |        |         |   |     |         |         |       |                                                                                       |   |        |          |   |     |         |         |       |                                                                                       |
|---------------|--------------|---|--------|---------|---|-----|---------|---------|-------|---------------------------------------------------------------------------------------|---|--------|----------|---|-----|---------|---------|-------|---------------------------------------------------------------------------------------|
| GW576484X     | BDP-00006392 | < | 5      | <5      | 0 | 100 | -2.9854 | -1.187  | +DMSO | 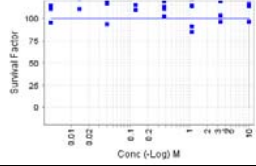   |   | 5.1961 | 6.366166 | 0 | 100 | -3.1346 | 0.588   | +LIMK |    |
| SB-610251-B   | BDP-00006494 | < | 5      | <5      | 0 | 100 | -20.202 | -0.8064 | +DMSO |    | < | 5      | <5       | 0 | 100 | -11.303 | -0.5137 | +LIMK |    |
| SB-590885-AAD | BDP-00006495 | < | 5      | <5      | 0 | 100 | -11.613 | 0.0083  | +DMSO |    |   | 5.1028 | 7.892057 | 0 | 100 | -3.2435 | 0.614   | +LIMK |    |
| GSK238063A    | BDP-00006501 | < | 5      | <5      | 0 | 100 | -1.4033 | 0.148   | +DMSO |    |   | 5.1677 | 6.797116 | 0 | 100 | -2.1171 | 0.7066  | +LIMK |    |
| GW693881A     | BDP-00006505 | < | 5      | <5      | 0 | 100 | -3.3962 | 0.216   | +DMSO |   | < | 5      | <5       | 0 | 100 | -0.5056 | 0.076   | +LIMK |   |
| GW784684X     | BDP-00006506 | > | 8.3372 | >8.3372 | 0 | 100 | 2.0862  | -0.1052 | +DMSO |  |   | 5.774  | 1.682542 | 0 | 100 | -2.1521 | 0.8211  | +LIMK |  |
