# Supplementary material for: LIM kinase inhibitors disrupt mitotic microtubule organization and impair tumor cell proliferation
Source: PubMed Central journal article supplement (PMC4770715; doi:10.18632/oncotarget.6288), 2015-11-03
Supplement: oncotarget-06-38469-s003.pdf [file oncotarget-06-38469-s003.pdf]

| Supplier Ref | FormalRefID | YCS9 M | REL YCS9 | ABS XCS9 | Min | Max | HilbSlope | R2     | Print | Graph | YCS9 M | REL YCS9 | ABS XCS9 | Min | Max | HilbSlope | R2     | Print | Graph | Condition | 2025 YCS9 M |
|--------------|-------------|--------|----------|----------|-----|-----|-----------|--------|-------|-------|--------|----------|----------|-----|-----|-----------|--------|-------|-------|-----------|-------------|
| GW63682X     | BDP-0006583 | =      | 6.2472   | 0.566988 | 0   | 100 | -0.3732   | 0.3648 | DMS   |       | =      | 7.0703   | 0.019819 | 0   | 100 | -0.8646   | 0.7251 | -LIMK |       |           | 28.85       |
| GW416881X    | BDP-0006643 | =      | 5.7582   | 1.797117 | 0   | 100 | -0.3073   | 0.4725 | DMS   |       | =      | 7.0794   | 0.035282 | 0   | 100 | -0.651    | 0.7413 | +LIMK |       |           | 21.10       |
| GW636742X    | BDP-0006596 | =      | 6.1352   | 0.732396 | 0   | 100 | -0.5779   | 0.351  | DMS   |       | =      | 7.4123   | 0.038686 | 0   | 100 | -15.027   | 0.5277 | -LIMK |       |           | 18.93       |
| GW770248X    | BDP-0006415 | =      | 5.1367   | 7.288197 | 0   | 100 | -1.8769   | 0.5163 | DMS   |       | =      | 5.9594   | 1.097005 | 0   | 100 | -39.474   | 0.5048 | +LIMK |       |           | 6.65        |
| GSK2186269A  | BDP-0006609 | =      | 5.9369   | 1.158276 | 0   | 100 | -2.6988   | 0.7282 | DMS   |       | =      | 6.7332   | 0.18496  | 0   | 100 | -3.8016   | 0.7323 | -LIMK |       |           | 6.25        |
| GSK2220400A  | BDP-0006410 | =      | 5.4755   | 3.346142 | 0   | 100 | -13.032   | 0.7436 | DMS   |       | =      | 6.2703   | 0.539818 | 0   | 100 | -1.6606   | 0.9121 | +LIMK |       |           | 6.24        |
| GW852848X    | BDP-0006584 | =      | 7.2138   | 0.081118 | 0   | 100 | -1.8699   | 0.3031 | DMS   |       | =      | 8.0084   | 0.009809 | 0   | 100 | -0.815    | 0.6866 | -LIMK |       |           | 6.23        |

|             |             |   |        |          |   |     |         |        |     |  |   |        |          |   |     |         |        |       |  |      |
|-------------|-------------|---|--------|----------|---|-----|---------|--------|-----|--|---|--------|----------|---|-----|---------|--------|-------|--|------|
| GW79042A    | BDP-0006514 | = | 5.1955 | 6.404701 | 0 | 100 | -1.9586 | 0.5466 | DMS |  | = | 5.9593 | 1.098163 | 0 | 100 | -1.3513 | 0.7283 | -LUMK |  | 5.83 |
| GW794307A   | BDP-0006357 | = | 6.9057 | 0.124258 | 0 | 100 | -1.2399 | 0.9181 | DMS |  | = | 7.6438 | 0.022711 | 0 | 100 | -0.8478 | 0.8728 | -LUMK |  | 5.47 |
| GSK117388A  | BDP-0006401 | = | 5.692  | 2.032518 | 0 | 100 | -1.2022 | 0.6444 | DMS |  | = | 6.4081 | 0.322655 | 0 | 100 | -19.732 | 0.6472 | -LUMK |  | 5.18 |
| GSK117382A  | BDP-0006279 | = | 7.1808 | 0.056943 | 0 | 100 | -1.9192 | 0.3785 | DMS |  | = | 7.8509 | 0.014697 | 0 | 100 | -1.3268 | 0.5748 | -LUMK |  | 4.88 |
| SR-68233A   | BDP-0006487 | = | 5.0279 | 9.377888 | 0 | 100 | -17.14  | 0.7059 | DMS |  | = | 5.6988 | 2.009821 | 0 | 100 | -5.0218 | 0.8409 | +LUMK |  | 4.67 |
| GW62752B    | BDP-0006156 | = | 5.4033 | 3.95363  | 0 | 100 | -0.9551 | 0.713  | DMS |  | = | 6.066  | 0.85589  | 0 | 100 | -1.9432 | 0.7844 | -LUMK |  | 4.60 |
| GSK2163632A | BDP-0006408 | = | 6.4805 | 0.330754 | 0 | 100 | -1.8211 | 0.9069 | DMS |  | = | 7.1427 | 0.071898 | 0 | 100 | -1.7778 | 0.5943 | +LUMK |  | 4.59 |

|             |              |   |        |          |   |     |         |        |     |  |   |        |          |   |     |         |        |       |  |      |
|-------------|--------------|---|--------|----------|---|-----|---------|--------|-----|--|---|--------|----------|---|-----|---------|--------|-------|--|------|
| GW661883X   | BDP-00006540 | = | 5.067  | 8.57137  | 0 | 100 | -1.172  | 0.5577 | DMS |  | = | 5.7106 | 1.947179 | 0 | 100 | -0.9246 | 0.7349 | -LIMK |  | 4.40 |
| GSK1326256A | BDP-00006281 | = | 6.8726 | 0.134075 | 0 | 100 | -2.1469 | 0.7922 | DMS |  | = | 7.4562 | 0.034982 | 0 | 100 | -2.0163 | 0.9219 | -LIMK |  | 3.83 |
| GW683194A   | BDP-00006598 | = | 5.3143 | 4.849051 | 0 | 100 | -2.344  | 0.6164 | DMS |  | = | 5.894  | 1.279305 | 0 | 100 | -1.1308 | 0.7734 | -LIMK |  | 3.80 |
| GSK227700A  | BDP-00006255 | = | 5.2099 | 6.16663  | 0 | 100 | -3.3912 | 0.5501 | DMS |  | = | 5.7606 | 1.657172 | 0 | 100 | -2.9175 | 0.9332 | -LIMK |  | 3.72 |
| GW846165X   | BDP-00006165 | = | 5.7456 | 1.798239 | 0 | 100 | -2.2394 | 0.8773 | DMS |  | = | 6.2904 | 0.612374 | 0 | 100 | -1.7028 | 0.9153 | +LIMK |  | 3.51 |
| GW666736X   | BDP-00006543 | = | 6.563  | 0.223535 | 0 | 100 | -1.1594 | 0.7646 | DMS |  | = | 7.0997 | 0.079493 | 0 | 100 | -4.3972 | 0.6697 | -LIMK |  | 3.44 |
| GW810372X   | BDP-00006389 | = | 5.2691 | 5.362007 | 0 | 100 | -5.9125 | 0.7885 | DMS |  | = | 5.791  | 1.617915 | 0 | 100 | -1.6932 | 0.797  | +LIMK |  | 3.33 |

|            |              |   |        |          |   |     |         |        |     |  |   |        |          |   |     |         |        |       |  |      |
|------------|--------------|---|--------|----------|---|-----|---------|--------|-----|--|---|--------|----------|---|-----|---------|--------|-------|--|------|
| GSK94854A  | BDP-00006283 | = | 7.388  | 0.040925 | 0 | 100 | -1.2944 | 0.7637 | DMS |  | = | 7.904  | 0.012319 | 0 | 100 | -1.5835 | 0.8745 | +LIMK |  | 3.32 |
| GW69887X   | BDP-00006297 | = | 6.9183 | 0.121247 | 0 | 100 | -2.713  | 0.7976 | DMS |  | = | 7.434  | 0.03881  | 0 | 100 | -2.7620 | 0.8529 | +LIMK |  | 3.29 |
| SB-221466  | BDP-00006464 | = | 5.9009 | 1.286288 | 0 | 100 | -2.8858 | 0.8865 | DMS |  | = | 6.4026 | 0.395727 | 0 | 100 | -3.1646 | 0.9105 | +LIMK |  | 3.17 |
| GW770289A  | BDP-00006415 | = | 5.4394 | 3.63359  | 0 | 100 | -20.305 | 0.7692 | DMS |  | = | 5.9265 | 1.184451 | 0 | 100 | -1.7776 | 0.8345 | +LIMK |  | 3.07 |
| GW770307X  | BDP-00006517 | = | 5.9301 | 1.174649 | 0 | 100 | -2.8965 | 0.8188 | DMS |  | = | 6.4127 | 0.384864 | 0 | 100 | -2.4766 | 0.8857 | +LIMK |  | 3.04 |
| GW440159A  | BDP-00006591 | = | 5.9315 | 4.08666  | 0 | 100 | -0.9503 | 0.5036 | DMS |  | = | 5.8614 | 1.376047 | 0 | 100 | -1.6598 | 0.8680 | +LIMK |  | 2.95 |
| GSK213727A | BDP-00006403 | = | 7.0844 | 0.08234  | 0 | 100 | -2.161  | 0.5143 | DMS |  | = | 7.5152 | 0.030632 | 0 | 100 | -1.3555 | 0.479  | +LIMK |  | 2.70 |

|             |             |   |        |          |   |     |         |        |     |  |   |        |          |   |     |         |        |       |  |      |
|-------------|-------------|---|--------|----------|---|-----|---------|--------|-----|--|---|--------|----------|---|-----|---------|--------|-------|--|------|
| GSK1511931A | BDP-0006465 | = | 5.9137 | 1.219775 | 0 | 100 | -1.154  | 0.793  | DMS |  | = | 6.3265 | 0.471477 | 0 | 100 | -0.9611 | 0.9013 | -LIMK |  | 2.59 |
| GW72621X    | BDP-0006220 | = | 5.1311 | 7.398891 | 0 | 100 | -1.7992 | 0.7966 | DMS |  | = | 5.5434 | 2.861654 | 0 | 100 | -2.2112 | 0.6591 | -LIMK |  | 2.58 |
| GW559768X   | BDP-0006482 | = | 6.5411 | 0.297675 | 0 | 100 | -0.9683 | 0.8204 | DMS |  | = | 6.9267 | 0.11688  | 0 | 100 | -0.3488 | 0.5974 | -LIMK |  | 2.43 |
| GW27665X    | BDP-0006419 | = | 5.097  | 7.990229 | 0 | 100 | -1.8578 | 0.4871 | DMS |  | = | 5.4621 | 3.459983 | 0 | 100 | -2.3148 | 0.5264 | -LIMK |  | 2.32 |
| GW620972X   | BDP-0006164 | = | 7.2923 | 0.01018  | 0 | 100 | -2.6559 | 0.877  | DMS |  | = | 7.6572 | 0.022017 | 0 | 100 | -3.1391 | 0.9301 | -LIMK |  | 2.32 |
| GSK614526A  | BDP-0006531 | = | 5.5449 | 2.851696 | 0 | 100 | -1.7034 | 0.8222 | DMS |  | = | 5.9103 | 1.24697  | 0 | 100 | -0.9702 | 0.6541 | -LIMK |  | 2.28 |
| SB-220465   | BDP-0006463 | = | 5.4589 | 3.478232 | 0 | 100 | -17.032 | 0.6524 | DMS |  | = | 5.7982 | 1.651601 | 0 | 100 | -4.0857 | 0.6906 | -LIMK |  | 2.18 |

|             |              |   |        |          |   |     |         |        |     |                                                                                      |   |        |          |   |     |         |        |       |                                                                                      |      |
|-------------|--------------|---|--------|----------|---|-----|---------|--------|-----|--------------------------------------------------------------------------------------|---|--------|----------|---|-----|---------|--------|-------|--------------------------------------------------------------------------------------|------|
| SB-725317   | BDP-00006204 | = | 6.3472 | 0.44958  | 0 | 100 | -1.163  | 0.9029 | DMS | 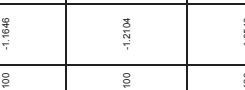   | = | 6.6855 | 0.206317 | 0 | 100 | -1.4659 | 0.9222 | -LINK |    | 2.18 |
| SB-726538   | BDP-00006449 | = | 5.6311 | 2.338389 | 0 | 100 | -1.6694 | 0.8175 | DMS |    | = | 5.6586 | 1.10009  | 0 | 100 | -30.237 | 0.9279 | +LINK |    | 2.13 |
| SB-22025-A  | BDP-00006482 | = | 6.1383 | 0.727299 | 0 | 100 | -1.1908 | 0.8876 | DMS |    | = | 6.4503 | 0.354649 | 0 | 100 | -1.0408 | 0.9086 | -LINK |   | 2.05 |
| SB-673259-M | BDP-00006598 | = | 6.2186 | 0.69451  | 0 | 100 | -1.8662 | 0.8411 | DMS |  | = | 6.5291 | 0.295756 | 0 | 100 | -1.1646 | 0.9391 | -LINK |  | 2.04 |
| GSK94394A   | BDP-00006225 | = | 5.5453 | 2.849103 | 0 | 100 | -2.4602 | 0.8478 | DMS |  | = | 5.8556 | 1.394627 | 0 | 100 | -1.2104 | 0.9045 | +LINK |  | 2.04 |
| GSK1007102B | BDP-00006223 | = | 6.8736 | 0.133776 | 0 | 100 | -1.4524 | 0.8856 | DMS |  | = | 7.1637 | 0.065511 | 0 | 100 | -1.6543 | 0.9522 | -LINK |  | 2.04 |
| GW43551X    | BDP-00006233 | = | 5.8192 | 1.516454 | 0 | 100 | -2.1684 | 0.8975 | DMS |  | = | 6.1285 | 0.743828 | 0 | 100 | -1.7169 | 0.8829 | +LINK |  | 2.04 |

|           |             |   |        |          |   |     |         |        |     |                                                                                   |   |        |         |   |     |         |        |       |                                                                                   |      |
|-----------|-------------|---|--------|----------|---|-----|---------|--------|-----|-----------------------------------------------------------------------------------|---|--------|---------|---|-----|---------|--------|-------|-----------------------------------------------------------------------------------|------|
| SB-245392 | BDP-0006440 | = | 5.9306 | 1.173129 | 0 | 100 | -19.726 | 0.8706 | DNS | 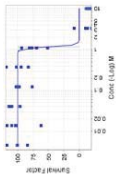 | = | 6.2364 | 0.96022 | 0 | 100 | -5.0337 | 0.6974 | -LINK |  | 2.02 |
|-----------|-------------|---|--------|----------|---|-----|---------|--------|-----|-----------------------------------------------------------------------------------|---|--------|---------|---|-----|---------|--------|-------|-----------------------------------------------------------------------------------|------|
