# Supplementary material for: LIM kinase inhibitors disrupt mitotic microtubule organization and impair tumor cell proliferation
Source: PubMed Central journal article supplement (PMC4770715; doi:10.18632/oncotarget.6288), 2015-11-03
Supplement: oncotarget-06-38469-s004.pdf [file oncotarget-06-38469-s004.pdf]

| Supplier Ref | Formatted ID | pXC50 M | REL pXC50 | ABS XC50 | Min | Max | Hillslope | R2     | bnDtl | Graph | XC50 M | REL pXC50 | ABS XC50 | Min | Max | Hillslope | R2     | Condition | Graph | Ratio ABS XC50 |
|--------------|--------------|---------|-----------|----------|-----|-----|-----------|--------|-------|-------|--------|-----------|----------|-----|-----|-----------|--------|-----------|-------|----------------|
| SB-251505    | BDP-00006442 | =       | 5.211     | 6.152424 | 0   | 100 | -3.1165   | 0.7402 | DMS   |       | =      | 5.5098    | 3.091936 | 0   | 100 | -1.5424   | 0.804  | +LIMK     |       | 1.99           |
| GSK312948A   | BDP-00006321 | =       | 5.7994    | 1.587156 | 0   | 100 | -2.4335   | 0.7638 | DMS   |       | =      | 6.0924    | 0.808398 | 0   | 100 | -1.8658   | 0.906  | +LIMK     |       | 1.96           |
| SB-732881    | BDP-00006203 | =       | 6.8763    | 0.132967 | 0   | 100 | -0.5533   | 0.7247 | DMS   |       | =      | 7.1634    | 0.068649 | 0   | 100 | -0.7469   | 0.9115 | +LIMK     |       | 1.94           |
| GW683003X    | BDP-00006475 | =       | 5.0031    | 9.92982  | 0   | 100 | -15.658   | 0.428  | DMS   |       | =      | 5.2777    | 5.275417 | 0   | 100 | -3.4141   | 0.7762 | +LIMK     |       | 1.88           |
| SB-236687    | BDP-00006467 | =       | 5.7303    | 1.860959 | 0   | 100 | -1.8308   | 0.8663 | DMS   |       | =      | 5.9978    | 1.005186 | 0   | 100 | -1.8127   | 0.8898 | +LIMK     |       | 1.85           |
| GSK1751853A  | BDP-00006402 | =       | 5.8313    | 1.474786 | 0   | 100 | -1.046    | 0.7857 | DMS   |       | =      | 6.0981    | 0.797837 | 0   | 100 | -1.3377   | 0.8803 | +LIMK     |       | 1.85           |
| GW618013A    | BDP-00006458 | =       | 5.169     | 6.776777 | 0   | 100 | -2.7229   | 0.6901 | DMS   |       | =      | 5.4274    | 3.737984 | 0   | 100 | -19.426   | 0.9037 | +LIMK     |       | 1.81           |

|              |              |   |        |          |   |     |         |        |      |                                                                                     |   |        |          |   |     |         |        |       |                                                                                       |      |
|--------------|--------------|---|--------|----------|---|-----|---------|--------|------|-------------------------------------------------------------------------------------|---|--------|----------|---|-----|---------|--------|-------|---------------------------------------------------------------------------------------|------|
| GW406731X    | BDP-00006230 | = | 5.2449 | 5.689497 | 0 | 100 | -1.965  | 0.7392 | DMSK | 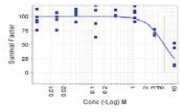   | = | 5.5014 | 3.151905 | 0 | 100 | -3.2703 | 0.7821 | +LIMK |    | 1.81 |
| GW589933X    | BDP-00006424 | = | 5.5017 | 3.149801 | 0 | 100 | -1.2292 | 0.7986 | DMSK |    | = | 5.757  | 1.749826 | 0 | 100 | -2.5125 | 0.8265 | +LIMK |    | 1.80 |
| GSK317314A   | BDP-00006257 | = | 7.1606 | 0.069086 | 0 | 100 | -2.5883 | 0.9013 | DMSK |    | = | 7.4134 | 0.038599 | 0 | 100 | -14.35  | 0.8847 | +LIMK |    | 1.79 |
| GW759710A    | BDP-00006349 | = | 5.1772 | 6.649779 | 0 | 100 | -4.0066 | 0.6921 | DMSK |   | = | 5.4232 | 3.77381  | 0 | 100 | -10.188 | 0.8547 | +LIMK |   | 1.76 |
| SB-742864    | BDP-00006212 | = | 6.068  | 0.855112 | 0 | 100 | -2.4279 | 0.8557 | DMSK |  | = | 6.3101 | 0.489651 | 0 | 100 | -1.9215 | 0.9594 | +LIMK |  | 1.75 |
| SB-698596-AC | BDP-00006201 | = | 5.0107 | 9.757068 | 0 | 100 | -1.9437 | 0.1297 | DMSK |  | = | 5.2505 | 5.617179 | 0 | 100 | -1.5044 | 0.6929 | +LIMK |  | 1.74 |
| GW694234A    | BDP-00006310 | = | 5.252  | 5.598222 | 0 | 100 | -2.5479 | 0.6799 | DMSK |  | = | 5.4876 | 3.254143 | 0 | 100 | -11.958 | 0.7256 | +LIMK |  | 1.72 |

|              |              |   |        |          |   |     |         |        |      |                                                                                     |   |        |          |   |     |         |        |       |                                                                                       |      |
|--------------|--------------|---|--------|----------|---|-----|---------|--------|------|-------------------------------------------------------------------------------------|---|--------|----------|---|-----|---------|--------|-------|---------------------------------------------------------------------------------------|------|
| GW869810X    | BDP-00006471 | = | 5.0596 | 8.717529 | 0 | 100 | -4.9364 | 0.6484 | DMSO | 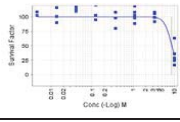   | = | 5.2913 | 5.113463 | 0 | 100 | -5.265  | 0.8821 | +LIMK |    | 1.70 |
| SB-284847-BT | BDP-00006451 | = | 5.4632 | 3.442016 | 0 | 100 | -20.262 | 0.8576 | DMSO |    | = | 5.694  | 2.022867 | 0 | 100 | -1.5461 | 0.8562 | +LIMK |    | 1.70 |
| GSK466314A   | BDP-00006288 | = | 5.2076 | 6.200311 | 0 | 100 | -2.3165 | 0.7183 | DMSO |    | = | 5.437  | 3.655691 | 0 | 100 | -1.7797 | 0.8314 | +LIMK |    | 1.70 |
| GW806290X    | BDP-00006367 | = | 7.4804 | 0.033082 | 0 | 100 | -1.6222 | 0.9409 | DMSO |   | = | 7.7053 | 0.019709 | 0 | 100 | -1.3188 | 0.9191 | +LIMK |   | 1.68 |
| SB-226879    | BDP-00006466 | = | 5.1721 | 6.72866  | 0 | 100 | -2.9618 | 0.7313 | DMSO |  | = | 5.3926 | 4.04982  | 0 | 100 | -1.8353 | 0.7488 | +LIMK |  | 1.66 |
| SB-250715    | BDP-00006441 | = | 5.2485 | 5.642631 | 0 | 100 | -2.9983 | 0.7564 | DMSO |  | = | 5.461  | 3.459376 | 0 | 100 | -20.115 | 0.874  | +LIMK |  | 1.63 |
| GW607049C    | BDP-00006304 | = | 5.2685 | 5.389456 | 0 | 100 | -4.2777 | 0.8358 | DMSO |  | = | 5.4802 | 3.309506 | 0 | 100 | -18.848 | 0.7969 | +LIMK |  | 1.63 |

|             |              |   |        |          |   |     |         |        |     |                                                                                     |   |        |          |   |     |         |        |       |                                                                                       |      |
|-------------|--------------|---|--------|----------|---|-----|---------|--------|-----|-------------------------------------------------------------------------------------|---|--------|----------|---|-----|---------|--------|-------|---------------------------------------------------------------------------------------|------|
| SB-409514   | BDP-00006194 | = | 5.0246 | 9.448226 | 0 | 100 | -17.184 | 0.8243 | DMS | 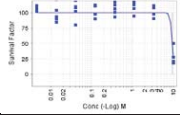   | = | 5.2359 | 5.809363 | 0 | 100 | -3.475  | 0.7659 | +LIMK |    | 1.63 |
| SB-253226   | BDP-00006444 | = | 5.4648 | 3.429125 | 0 | 100 | -27.568 | 0.8814 | DMS |    | = | 5.6648 | 2.163445 | 0 | 100 | -3.3025 | 0.92   | +LIMK |    | 1.59 |
| GW874091X   | BDP-00006341 | = | 5.339  | 4.581064 | 0 | 100 | -1.8008 | 0.8388 | DMS |    | = | 5.5308 | 2.945734 | 0 | 100 | -1.2712 | 0.8419 | +LIMK |    | 1.56 |
| SB-220025-R | BDP-00006462 | = | 6.4983 | 0.317476 | 0 | 100 | -20.282 | 0.9077 | DMS |   | = | 6.6734 | 0.212141 | 0 | 100 | -5.3676 | 0.9051 | +LIMK |   | 1.50 |
| SB-242719   | BDP-00006438 | = | 5.4485 | 3.56042  | 0 | 100 | -19.576 | 0.7551 | DMS |  | = | 5.6142 | 2.430083 | 0 | 100 | -1.8331 | 0.883  | +LIMK |  | 1.46 |
| GW406108X   | BDP-00006488 | = | 5.0698 | 8.515001 | 0 | 100 | -3.5333 | 0.5243 | DMS |  | = | 5.2044 | 6.245911 | 0 | 100 | -3.8251 | 0.7677 | +LIMK |  | 1.36 |
| GW876790X   | BDP-00006333 | = | 5.3025 | 4.982952 | 0 | 100 | -2.5216 | 0.7229 | DMS |  | = | 5.4308 | 3.708654 | 0 | 100 | -2.3416 | 0.7234 | +LIMK |  | 1.34 |

|             |              |   |        |          |   |     |         |        |      |                                                                                     |   |        |          |   |     |         |        |       |                                                                                       |      |
|-------------|--------------|---|--------|----------|---|-----|---------|--------|------|-------------------------------------------------------------------------------------|---|--------|----------|---|-----|---------|--------|-------|---------------------------------------------------------------------------------------|------|
| GSK1392956A | BDP-00006282 | = | 6.5798 | 0.263175 | 0 | 100 | -2.0762 | 0.9494 | DMSO | 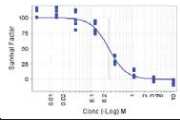   | = | 6.6972 | 0.200831 | 0 | 100 | -1.5791 | 0.9211 | +LIMK |    | 1.31 |
| GSK2110236A | BDP-00006407 | = | 7.0611 | 0.08688  | 0 | 100 | -2.377  | 0.9342 | DMSO |    | = | 7.1773 | 0.066475 | 0 | 100 | -2.4928 | 0.9411 | +LIMK |    | 1.31 |
| SB-390527   | BDP-00006192 | = | 5.5006 | 3.157876 | 0 | 100 | -2.0373 | 0.8285 | DMSO |    | = | 5.6113 | 2.447551 | 0 | 100 | -3.4799 | 0.8825 | +LIMK |    | 1.29 |
| SB-750140   | BDP-00006183 | = | 5.1166 | 7.644967 | 0 | 100 | -1.5952 | 0.609  | DMSO |   | = | 5.2216 | 6.003355 | 0 | 100 | -1.7384 | 0.541  | +LIMK |   | 1.27 |
| SB-678557-A | BDP-00006199 | = | 5.0045 | 9.897678 | 0 | 100 | -2.2518 | 0.4337 | DMSO |  | = | 5.0987 | 7.966595 | 0 | 100 | -3.5019 | 0.5736 | +LIMK |  | 1.24 |
| SB-686709-A | BDP-00006200 | = | 5.4843 | 3.278511 | 0 | 100 | -2.6374 | 0.8571 | DMSO |  | = | 5.5741 | 2.666502 | 0 | 100 | -2.382  | 0.7387 | +LIMK |  | 1.23 |
| SB-400868-A | BDP-00006335 | = | 5.4299 | 3.716119 | 0 | 100 | -20.377 | 0.8151 | DMSO |  | = | 5.5021 | 3.146759 | 0 | 100 | -19.2   | 0.8877 | +LIMK |  | 1.18 |

|              |              |   |        |          |   |     |         |        |      |                                                                                     |   |        |          |   |     |         |        |       |                                                                                       |      |
|--------------|--------------|---|--------|----------|---|-----|---------|--------|------|-------------------------------------------------------------------------------------|---|--------|----------|---|-----|---------|--------|-------|---------------------------------------------------------------------------------------|------|
| GW575808A    | BDP-00006348 | = | 5.3356 | 4.617017 | 0 | 100 | -3.0293 | 0.8471 | DMSK | 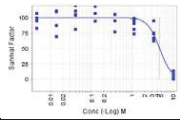   | = | 5.4057 | 3.929345 | 0 | 100 | -3.6876 | 0.8093 | +LIMK |    | 1.18 |
| SB-732881-H  | BDP-00006203 | = | 6.7717 | 0.169159 | 0 | 100 | -3.5112 | 0.8222 | DMSK |    | = | 6.8315 | 0.147398 | 0 | 100 | -2.958  | 0.9152 | +LIMK |    | 1.15 |
| SB-741905    | BDP-00006211 | = | 5.1582 | 6.947787 | 0 | 100 | -3.2295 | 0.7396 | DMSK |    | = | 5.2087 | 6.184895 | 0 | 100 | -4.8024 | 0.8241 | +LIMK |    | 1.12 |
| SB-739245-AC | BDP-00006209 | = | 5.4138 | 3.856274 | 0 | 100 | -17.9   | 0.7808 | DMSK |   | = | 5.4602 | 3.465548 | 0 | 100 | -14.394 | 0.8246 | +LIMK |   | 1.11 |
| GSK949675A   | BDP-00006226 | = | 5.3932 | 4.044171 | 0 | 100 | -4.0243 | 0.8661 | DMSK |  | = | 5.4254 | 3.754573 | 0 | 100 | -5.4048 | 0.8848 | +LIMK |  | 1.08 |
| SB-732941    | BDP-00006205 | = | 5.4603 | 3.465172 | 0 | 100 | -17.797 | 0.6872 | DMSK |  | = | 5.4875 | 3.254284 | 0 | 100 | -15.916 | 0.7148 | +LIMK |  | 1.06 |
| GW612286X    | BDP-00006290 | = | 6.1648 | 0.684162 | 0 | 100 | -1.5249 | 0.9066 | DMSK |  | = | 6.1811 | 0.658975 | 0 | 100 | -1.74   | 0.935  | +LIMK |  | 1.04 |

|            |              |   |        |          |   |     |         |        |      |                                                                                     |   |        |          |   |     |         |        |       |                                                                                       |      |
|------------|--------------|---|--------|----------|---|-----|---------|--------|------|-------------------------------------------------------------------------------------|---|--------|----------|---|-----|---------|--------|-------|---------------------------------------------------------------------------------------|------|
| GSK978744A | BDP-00006262 | = | 6.9395 | 0.114957 | 0 | 100 | -3.8906 | 0.9224 | DMSO | 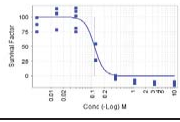   | = | 6.9526 | 0.111529 | 0 | 100 | -20.92  | 0.9553 | +LIMK |    | 1.03 |
| SB-239272  | BDP-00006435 | = | 5.0039 | 9.909662 | 0 | 100 | -4.2872 | 0.6619 | DMSO |    | = | 5.0094 | 9.786615 | 0 | 100 | -2.6824 | 0.5340 | +LIMK |    | 1.01 |
| GW673715X  | BDP-00006306 | = | 5.0266 | 9.405027 | 0 | 100 | -17.064 | 0.7001 | DMSO |    | = | 5.0054 | 9.875421 | 0 | 100 | -16.669 | 0.4836 | +LIMK |    | 0.95 |
| GSK312948A | BDP-00006321 | = | 5.1198 | 7.589701 | 0 | 100 | -2.8029 | 0.5557 | DMSO |   | = | 5.0903 | 8.122335 | 0 | 100 | -2.2739 | 0.5187 | +LIMK |   | 0.93 |
| GW843682X  | BDP-00006263 | = | 5.6479 | 2.249788 | 0 | 100 | -1.6698 | 0.7858 | DMSO |  | = | 5.5226 | 3.002176 | 0 | 100 | -23.203 | 0.8836 | +LIMK |  | 0.75 |
| SB-742864  | BDP-00006212 | = | 5.1788 | 6.625823 | 0 | 100 | -5.7713 | 0.7153 | DMSO |  | = | 5.0422 | 9.074967 | 0 | 100 | -15.239 | 0.7387 | +LIMK |  | 0.73 |
| GSK237701A | BDP-00006256 | = | 5.2281 | 5.913738 | 0 | 100 | -23.439 | 0.8063 | DMSO |  | = | 5.0856 | 8.210355 | 0 | 100 | -20.468 | 0.7842 | +LIMK |  | 0.72 |

|             |              |   |        |          |   |     |         |        |      |                                                                                     |   |        |          |   |     |         |        |       |                                                                                       |      |
|-------------|--------------|---|--------|----------|---|-----|---------|--------|------|-------------------------------------------------------------------------------------|---|--------|----------|---|-----|---------|--------|-------|---------------------------------------------------------------------------------------|------|
| SB-814597   | BDP-00006168 | = | 5.1802 | 6.603438 | 0 | 100 | -2.3411 | 0.659  | DMSD | 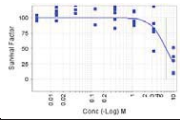   | = | 5.0002 | 9.996295 | 0 | 100 | -0.8102 | 0.5441 | +LIMK |    | 0.66 |
| GSK614526A  | BDP-00006331 | = | 5.2916 | 5.109279 | 0 | 100 | -1.7832 | 0.7162 | DMSD |    | = | 5.0866 | 8.192008 | 0 | 100 | -1.3329 | 0.7131 | +LIMK |    | 0.62 |
| GW837331X   | BDP-00006339 | = | 5.9756 | 1.057708 | 0 | 100 | -0.7645 | 0.8495 | DMSD |    | = | 5.7664 | 1.712466 | 0 | 100 | -0.5746 | 0.7468 | +LIMK |    | 0.62 |
| SB-675259-M | BDP-00006198 | = | 5.2681 | 5.393501 | 0 | 100 | -0.9643 | 0.469  | DMSD |   | = | 5.0488 | 8.937745 | 0 | 100 | -1.0907 | 0.2609 | +LIMK |   | 0.60 |
| GW680191X   | BDP-00006485 | = | 5.4394 | 3.635952 | 0 | 100 | -1.8584 | 0.7966 | DMSD |  | = | 5.1861 | 6.515358 | 0 | 100 | -0.5469 | 0.4694 | +LIMK |  | 0.56 |
