# Supplementary material for: LIM kinase inhibitors disrupt mitotic microtubule organization and impair tumor cell proliferation
Source: PubMed Central journal article supplement (PMC4770715; doi:10.18632/oncotarget.6288), 2015-11-03
Supplement: oncotarget-06-38469-s005.pdf [file oncotarget-06-38469-s005.pdf]

| Supplier Ref | Formatted ID | REL_pXC50 Modifier | REL_pXC50 | ABS_XC50 | Min | Max | Hillslope | R2      | Condition | Graph | REL_pXC50 Modifier | REL_pXC50 | ABS_XC50 | Min | Max | Hillslope | R2      | Condition | Graph |
|--------------|--------------|--------------------|-----------|----------|-----|-----|-----------|---------|-----------|-------|--------------------|-----------|----------|-----|-----|-----------|---------|-----------|-------|
| GW769076X    | BDP-00006145 | <                  | 5         | <5       | 0   | 100 | -0.8898   | -0.1234 | +DMSO     |       | <                  | 5         | <5       | 0   | 100 | -11.026   | -0.2524 | +LIMK     |       |
| GW775608X    | BDP-00006146 | <                  | 5         | <5       | 0   | 100 | -88.174   | -0.3606 | +DMSO     |       | <                  | 5         | <5       | 0   | 100 | -12.14    | 0.0858  | +LIMK     |       |
| GW549390X    | BDP-00006147 | <                  | 5         | <5       | 0   | 100 | -8.9223   | -0.4163 | +DMSO     |       | <                  | 5         | <5       | 0   | 100 | -0.7895   | 0.2256  | +LIMK     |       |
| GW572399X    | BDP-00006148 | <                  | 5         | <5       | 0   | 100 | -0.7388   | 0.5256  | +DMSO     |       | =                  | 5.302     | 4.989159 | 0   | 100 | -0.8315   | 0.7525  | +LIMK     |       |
| GW572401X    | BDP-00006149 | <                  | 5         | <5       | 0   | 100 | -0.632    | 0.012   | +DMSO     |       | <                  | 5         | <5       | 0   | 100 | -0.6019   | 0.1076  | +LIMK     |       |
| GW575533A    | BDP-00006150 | <                  | 5         | <5       | 0   | 100 | -659.58   | -0.3354 | +DMSO     |       | >                  | 8.3372    | >8.3372  | 0   | 100 | 3.4163    | -0.1116 | +LIMK     |       |

|           |              |   |        |         |   |     |         |         |       |                                                                                     |   |   |    |   |     |         |         |       |                                                                                       |
|-----------|--------------|---|--------|---------|---|-----|---------|---------|-------|-------------------------------------------------------------------------------------|---|---|----|---|-----|---------|---------|-------|---------------------------------------------------------------------------------------|
| GW577921A | BDP-00006151 | > | 8.3372 | >8.3372 | 0 | 100 | 9.2067  | -0.2467 | +DMSO | 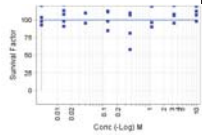   | < | 5 | <5 | 0 | 100 | -15.1   | -1.9645 | +LIMK |    |
| GW580509X | BDP-00006152 | < | 5      | <5      | 0 | 100 | -0.9055 | 0.0411  | +DMSO |    | < | 5 | <5 | 0 | 100 | -0.847  | 0.1844  | +LIMK |    |
| GW621431X | BDP-00006153 | < | 5      | <5      | 0 | 100 | -62.671 | -0.8055 | +DMSO |    | < | 5 | <5 | 0 | 100 | -0.6663 | 0.0592  | +LIMK |    |
| GW621970X | BDP-00006154 | < | 5      | <5      | 0 | 100 | -0.7053 | 0.2777  | +DMSO |  | < | 5 | <5 | 0 | 100 | -0.4555 | 0.2833  | +LIMK |  |
| GW622055X | BDP-00006155 | < | 5      | <5      | 0 | 100 | -349.55 | -0.3622 | +DMSO |  | < | 5 | <5 | 0 | 100 | -17.849 | -0.0907 | +LIMK |  |
| GW627834A | BDP-00006157 | < | 5      | <5      | 0 | 100 | -1.4697 | -0.2761 | +DMSO |  | < | 5 | <5 | 0 | 100 | -1.8995 | -0.0824 | +LIMK |  |

|            |              |   |        |         |   |     |         |         |       |                                                                                     |   |        |         |   |     |         |         |       |                                                                                       |
|------------|--------------|---|--------|---------|---|-----|---------|---------|-------|-------------------------------------------------------------------------------------|---|--------|---------|---|-----|---------|---------|-------|---------------------------------------------------------------------------------------|
| GW631581B  | BDP-00006158 | < | 5      | <5      | 0 | 100 | -9.033  | -1.2988 | +DMSO | 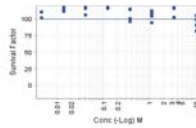   | > | 8.3372 | >8.3372 | 0 | 100 | -10.083 | -0.3448 | +LIMK |    |
| GW632046X  | BDP-00006159 | < | 5      | <5      | 0 | 100 | -51.292 | -0.6812 | +DMSO |    | < | 5      | <5      | 0 | 100 | -49.769 | -0.3299 | +LIMK |    |
| GW641155A  | BDP-00006160 | > | 8.3372 | >8.3372 | 0 | 100 | -8.7732 | -0.72   | +DMSO |    | < | 5      | <5      | 0 | 100 | -0.1176 | 0.0024  | +LIMK |    |
| GW678313X  | BDP-00006161 | < | 5      | <5      | 0 | 100 | -41.973 | -0.2124 | +DMSO |  | < | 5      | <5      | 0 | 100 | -1.8773 | -0.0845 | +LIMK |  |
| GSK718429A | BDP-00006162 | < | 5      | <5      | 0 | 100 | -11.646 | -0.6831 | +DMSO |  | < | 5      | <5      | 0 | 100 | -1.5185 | 0.2991  | +LIMK |  |
| GW572738X  | BDP-00006163 | > | 8.3372 | >8.3372 | 0 | 100 | -0.8464 | 0.0196  | +DMSO |  | < | 5      | <5      | 0 | 100 | -0.495  | 0.2911  | +LIMK |  |

|               |              |   |        |         |   |     |         |         |       |                                                                                     |   |        |          |   |     |         |         |       |                                                                                       |
|---------------|--------------|---|--------|---------|---|-----|---------|---------|-------|-------------------------------------------------------------------------------------|---|--------|----------|---|-----|---------|---------|-------|---------------------------------------------------------------------------------------|
| SB-347804     | BDP-00006166 | < | 5      | <5      | 0 | 100 | -10.453 | -0.2453 | +DMSO | 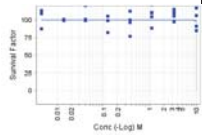   | < | 5      | <5       | 0 | 100 | -0.0833 | 0.011   | +LIMK |    |
| SB-657836-AAA | BDP-00006167 | > | 8.3372 | >8.3372 | 0 | 100 | 4.8013  | -0.5692 | +DMSO |    | < | 5      | <5       | 0 | 100 | -10.351 | -0.1056 | +LIMK |    |
| SB-814597     | BDP-00006168 | < | 5      | <5      | 0 | 100 | -2.2604 | 0.1177  | +DMSO |    | = | 5.5694 | 2.695399 | 0 | 100 | -0.7184 | 0.6242  | +LIMK |    |
| GSK586581A    | BDP-00006169 | < | 5      | <5      | 0 | 100 | -11.429 | 0.0037  | +DMSO |  | < | 5      | <5       | 0 | 100 | -1.3891 | -0.3614 | +LIMK |  |
| GSK605714A    | BDP-00006170 | < | 5      | <5      | 0 | 100 | -187.2  | -0.5254 | +DMSO |  | < | 5      | <5       | 0 | 100 | -309.56 | -0.2517 | +LIMK |  |
| GSK620503A    | BDP-00006171 | < | 5      | <5      | 0 | 100 | -1.9492 | -0.3173 | +DMSO |  | < | 5      | <5       | 0 | 100 | -0.7035 | 0.1273  | +LIMK |  |

|            |              |   |        |         |   |     |         |         |       |                                                                                     |   |        |          |   |     |         |         |       |                                                                                       |
|------------|--------------|---|--------|---------|---|-----|---------|---------|-------|-------------------------------------------------------------------------------------|---|--------|----------|---|-----|---------|---------|-------|---------------------------------------------------------------------------------------|
| GSK625137A | BDP-00006172 | < | 5      | <5      | 0 | 100 | -11.024 | -1.0064 | +DMSO | 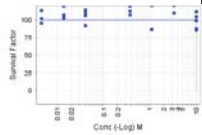   | < | 5      | <5       | 0 | 100 | -11.878 | -0.4269 | +LIMK |    |
| GSK635416A | BDP-00006173 | < | 5      | <5      | 0 | 100 | -27.082 | -0.9441 | +DMSO |    | = | 5.2434 | 5.709663 | 0 | 100 | -1.7378 | 0.7379  | +LIMK |    |
| GSK711701A | BDP-00006174 | < | 5      | <5      | 0 | 100 | -0.9485 | 0.0788  | +DMSO |    | < | 5      | <5       | 0 | 100 | -1.9835 | -0.1554 | +LIMK |    |
| GW549034X  | BDP-00006175 | < | 5      | <5      | 0 | 100 | -2.7254 | -0.2732 | +DMSO |  | < | 5      | <5       | 0 | 100 | -212.74 | -0.1188 | +LIMK |  |
| GW785404X  | BDP-00006176 | > | 8.3372 | >8.3372 | 0 | 100 | 3.0603  | -0.1065 | +DMSO |  | > | 8.3372 | >8.3372  | 0 | 100 | 0.1814  | 0.0147  | +LIMK |  |
| SB-734117  | BDP-00006177 | < | 5      | <5      | 0 | 100 | -163.89 | -1.218  | +DMSO |  | < | 5      | <5       | 0 | 100 | -1.2119 | -0.0747 | +LIMK |  |

|           |              |   |        |         |   |     |         |         |       |                                                                                     |   |        |          |   |     |         |         |       |                                                                                       |
|-----------|--------------|---|--------|---------|---|-----|---------|---------|-------|-------------------------------------------------------------------------------------|---|--------|----------|---|-----|---------|---------|-------|---------------------------------------------------------------------------------------|
| SB-736290 | BDP-00006178 | < | 5      | <5      | 0 | 100 | -66.557 | -0.2821 | +DMSO | 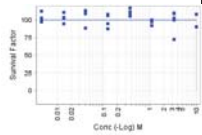   | < | 5      | <5       | 0 | 100 | -13.244 | -1.5402 | +LIMK |    |
| SB-736302 | BDP-00006179 | < | 5      | <5      | 0 | 100 | -12.366 | 0.1145  | +DMSO |    | = | 5.0084 | 9.808709 | 0 | 100 | -16.262 | 0.2257  | +LIMK |    |
| SB-738561 | BDP-00006180 | < | 5      | <5      | 0 | 100 | -421.05 | -0.4962 | +DMSO |    | < | 5      | <5       | 0 | 100 | -320.19 | -0.1111 | +LIMK |    |
| SB-737198 | BDP-00006181 | > | 8.3372 | >8.3372 | 0 | 100 | 0.1414  | 0.0181  | +DMSO |  | < | 5      | <5       | 0 | 100 | -0.0682 | 0.0075  | +LIMK |  |
| SB-744941 | BDP-00006182 | < | 5      | <5      | 0 | 100 | -11.729 | -0.1106 | +DMSO |  | < | 5      | <5       | 0 | 100 | -22.937 | -0.7956 | +LIMK |  |
| SB-751148 | BDP-00006184 | < | 5      | <5      | 0 | 100 | -10.302 | -0.0459 | +DMSO |  | < | 5      | <5       | 0 | 100 | -41.712 | -0.3729 | +LIMK |  |

|           |              |   |        |         |   |     |         |         |       |                                                                                     |   |        |         |   |     |         |         |       |                                                                                       |
|-----------|--------------|---|--------|---------|---|-----|---------|---------|-------|-------------------------------------------------------------------------------------|---|--------|---------|---|-----|---------|---------|-------|---------------------------------------------------------------------------------------|
| SB-751399 | BDP-00006185 | < | 5      | <5      | 0 | 100 | -1.2405 | -0.0489 | +DMSO | 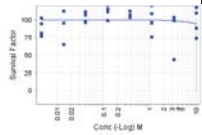   | < | 5      | <5      | 0 | 100 | -19.838 | -0.2124 | +LIMK |    |
| SB-333612 | BDP-00006186 | < | 5      | <5      | 0 | 100 | -0.8213 | 0.1806  | +DMSO |    | < | 5      | <5      | 0 | 100 | -0.4273 | 0.0596  | +LIMK |    |
| SB-358518 | BDP-00006187 | < | 5      | <5      | 0 | 100 | -14.318 | -0.1538 | +DMSO |    | < | 5      | <5      | 0 | 100 | -2.3144 | -0.2975 | +LIMK |    |
| SB-360741 | BDP-00006188 | > | 8.3372 | >8.3372 | 0 | 100 | 1.8581  | 0.0763  | +DMSO |  | > | 8.3372 | >8.3372 | 0 | 100 | 0.2306  | 0.008   | +LIMK |  |
| SB-376719 | BDP-00006190 | < | 5      | <5      | 0 | 100 | -1.2498 | 0.5651  | +DMSO |  | < | 5      | <5      | 0 | 100 | -0.8953 | -0.0891 | +LIMK |  |
| SB-390523 | BDP-00006191 | < | 5      | <5      | 0 | 100 | -522.85 | -0.1281 | +DMSO |  | < | 5      | <5      | 0 | 100 | -10.672 | -0.284  | +LIMK |  |

|            |              |   |   |    |   |     |         |         |       |                                                                                     |   |        |         |   |     |         |         |       |                                                                                       |
|------------|--------------|---|---|----|---|-----|---------|---------|-------|-------------------------------------------------------------------------------------|---|--------|---------|---|-----|---------|---------|-------|---------------------------------------------------------------------------------------|
| SB-409513  | BDP-00006193 | < | 5 | <5 | 0 | 100 | -0.4846 | 0.0232  | +DMSO | 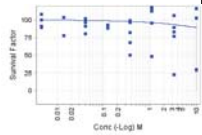   | > | 8.3372 | >8.3372 | 0 | 100 | 1.5341  | -0.0028 | +LIMK |    |
| SKF-62604  | BDP-00006195 | < | 5 | <5 | 0 | 100 | -1.3538 | -0.0209 | +DMSO |    | > | 8.3372 | >8.3372 | 0 | 100 | 0.0124  | 0       | +LIMK |    |
| GW819230X  | BDP-00006196 | < | 5 | <5 | 0 | 100 | -12.427 | -0.3295 | +DMSO |   | < | 5      | <5      | 0 | 100 | -11.264 | 0.0088  | +LIMK |   |
| GSK319347A | BDP-00006197 | < | 5 | <5 | 0 | 100 | -3.0707 | -1.5512 | +DMSO |  | < | 5      | <5      | 0 | 100 | -11.83  | -0.4518 | +LIMK |  |
| SB-711237  | BDP-00006202 | < | 5 | <5 | 0 | 100 | -203.72 | -0.7312 | +DMSO |  | < | 5      | <5      | 0 | 100 | -2.0627 | -0.0663 | +LIMK |  |
| SB-735465  | BDP-00006206 | < | 5 | <5 | 0 | 100 | -9.2346 | -0.2865 | +DMSO |  | > | 8.3372 | >8.3372 | 0 | 100 | -0.8593 | 0.2166  | +LIMK |  |



|           |              |   |        |         |   |     |         |         |       |  |   |   |    |   |     |         |         |       |  |
|-----------|--------------|---|--------|---------|---|-----|---------|---------|-------|--|---|---|----|---|-----|---------|---------|-------|--|
| SB-738482 | BDP-00006208 | < | 5      | <5      | 0 | 100 | -7.3069 | -0.0396 | +DMSO |  | < | 5 | <5 | 0 | 100 | -133.47 | -0.2756 | +LIMK |  |
| SB-739452 | BDP-00006210 | < | 5      | <5      | 0 | 100 | -0.7717 | 0.0365  | +DMSO |  | < | 5 | <5 | 0 | 100 | -0.968  | -0.0209 | +LIMK |  |
| SB-742865 | BDP-00006213 | > | 8.3372 | >8.3372 | 0 | 100 | 2.1254  | -0.1137 | +DMSO |  | < | 5 | <5 | 0 | 100 | -9.8522 | -0.0808 | +LIMK |  |
| SB-743899 | BDP-00006214 | < | 5      | <5      | 0 | 100 | -193.42 | -0.5743 | +DMSO |  | < | 5 | <5 | 0 | 100 | -42.628 | -0.5691 | +LIMK |  |
| GW651576X | BDP-00006215 | < | 5      | <5      | 0 | 100 | -13.673 | -0.6471 | +DMSO |  | < | 5 | <5 | 0 | 100 | -11.947 | -0.028  | +LIMK |  |
| GW659893X | BDP-00006216 | < | 5      | <5      | 0 | 100 | -11.5   | -0.3576 | +DMSO |  | < | 5 | <5 | 0 | 100 | -1.1272 | 0.3678  | +LIMK |  |

|             |              |   |   |    |   |     |         |         |       |                                                                                     |   |        |          |   |     |         |        |       |                                                                                       |
|-------------|--------------|---|---|----|---|-----|---------|---------|-------|-------------------------------------------------------------------------------------|---|--------|----------|---|-----|---------|--------|-------|---------------------------------------------------------------------------------------|
| GW703087X   | BDP-00006217 | < | 5 | <5 | 0 | 100 | -6.4791 | 0.7797  | +DMSO | 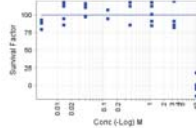   | = | 5.1474 | 7.121942 | 0 | 100 | -4.7437 | 0.6664 | +LIMK |    |
| GW772405X   | BDP-00006218 | < | 5 | <5 | 0 | 100 | -11.289 | -0.7458 | +DMSO |    | = | 5.31   | 4.897392 | 0 | 100 | -3.8292 | 0.7909 | +LIMK |    |
| GW794726X   | BDP-00006219 | < | 5 | <5 | 0 | 100 | -484.37 | -0.4551 | +DMSO |    | < | 5      | <5       | 0 | 100 | -2.7018 | 0.0425 | +LIMK |    |
| GW799251X   | BDP-00006220 | < | 5 | <5 | 0 | 100 | -4.0758 | 0.282   | +DMSO |   | < | 5      | <5       | 0 | 100 | -2.3216 | 0.1701 | +LIMK |   |
| GW807930X   | BDP-00006221 | < | 5 | <5 | 0 | 100 | -0.0759 | 0.0047  | +DMSO |  | < | 5      | <5       | 0 | 100 | -0.5385 | 0.3021 | +LIMK |  |
| GSK1000163A | BDP-00006222 | < | 5 | <5 | 0 | 100 | -222.97 | -0.6918 | +DMSO |  | < | 5      | <5       | 0 | 100 | -11.933 | 0.0671 | +LIMK |  |

|            |              |   |        |          |   |     |         |         |       |                                                                                     |   |        |          |   |     |         |         |       |                                                                                       |
|------------|--------------|---|--------|----------|---|-----|---------|---------|-------|-------------------------------------------------------------------------------------|---|--------|----------|---|-----|---------|---------|-------|---------------------------------------------------------------------------------------|
| GSK938890A | BDP-00006224 | = | 5.0269 | 9.400083 | 0 | 100 | -17.819 | 0.3707  | +DMSO | 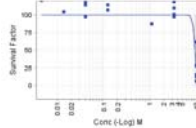   | < | 5      | <5       | 0 | 100 | -7.333  | -0.0007 | +LIMK |    |
| GW824645A  | BDP-00006227 | < | 5      | <5       | 0 | 100 | -313.93 | -0.5349 | +DMSO |    | > | 8.3372 | >8.3372  | 0 | 100 | 1.0019  | -0.019  | +LIMK |    |
| GW824645A  | BDP-00006227 | < | 5      | <5       | 0 | 100 | -12.29  | -0.1773 | +DMSO |    | = | 5.0146 | 9.668382 | 0 | 100 | -17.008 | 0.4522  | +LIMK |    |
| GW831090X  | BDP-00006228 | < | 5      | <5       | 0 | 100 | -11.363 | -0.3577 | +DMSO |   | < | 5      | <5       | 0 | 100 | -11.481 | -0.0659 | +LIMK |   |
| GW831091X  | BDP-00006229 | > | 8.3372 | >8.3372  | 0 | 100 | 11.167  | -0.1619 | +DMSO |  | < | 5      | <5       | 0 | 100 | -1.4624 | 0.0824  | +LIMK |  |
| GW427984X  | BDP-00006231 | > | 8.3372 | >8.3372  | 0 | 100 | 2.1651  | -0.6617 | +DMSO |  | < | 5      | <5       | 0 | 100 | -609.85 | -0.7235 | +LIMK |  |

|           |              |   |   |    |   |     |         |         |       |                                                                                     |   |        |          |   |     |         |         |       |                                                                                       |
|-----------|--------------|---|---|----|---|-----|---------|---------|-------|-------------------------------------------------------------------------------------|---|--------|----------|---|-----|---------|---------|-------|---------------------------------------------------------------------------------------|
| GW432441X | BDP-00006232 | < | 5 | <5 | 0 | 100 | -11.444 | -0.0247 | +DMSO | 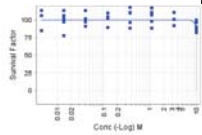   | < | 5      | <5       | 0 | 100 | -0.4143 | 0.0329  | +LIMK |    |
| GW439255X | BDP-00006234 | < | 5 | <5 | 0 | 100 | -10.646 | -0.2244 | +DMSO |    | = | 5.0281 | 9.372745 | 0 | 100 | -1.2494 | 0.3881  | +LIMK |    |
| GW441806A | BDP-00006235 | < | 5 | <5 | 0 | 100 | -298.7  | -0.471  | +DMSO |    | < | 5      | <5       | 0 | 100 | -202.4  | -0.2942 | +LIMK |    |
| GW445012X | BDP-00006236 | < | 5 | <5 | 0 | 100 | -76.581 | -1.891  | +DMSO |  | < | 5      | <5       | 0 | 100 | -479.75 | -0.8507 | +LIMK |  |
| GW445014X | BDP-00006237 | < | 5 | <5 | 0 | 100 | -10.799 | -0.1881 | +DMSO |  | < | 5      | <5       | 0 | 100 | -11.252 | -0.111  | +LIMK |  |
| GW445015X | BDP-00006238 | < | 5 | <5 | 0 | 100 | -147.16 | -0.524  | +DMSO |  | < | 5      | <5       | 0 | 100 | -7.5516 | -0.1773 | +LIMK |  |

|           |              |   |   |    |   |     |         |         |       |                                                                                     |   |        |          |   |     |         |         |       |                                                                                       |
|-----------|--------------|---|---|----|---|-----|---------|---------|-------|-------------------------------------------------------------------------------------|---|--------|----------|---|-----|---------|---------|-------|---------------------------------------------------------------------------------------|
| GW445017X | BDP-00006239 | < | 5 | <5 | 0 | 100 | -32.528 | -0.2668 | +DMSO |    | < | 5      | <5       | 0 | 100 | -19.078 | -0.6123 | +LIMK |    |
| GW450241X | BDP-00006240 | < | 5 | <5 | 0 | 100 | -16.157 | 0.2664  | +DMSO |    | < | 5      | <5       | 0 | 100 | -6.2267 | 0.5705  | +LIMK |    |
| GW458344A | BDP-00006241 | < | 5 | <5 | 0 | 100 | -10.746 | -0.1279 | +DMSO |    | > | 8.3372 | >8.3372  | 0 | 100 | 0.506   | 0.0236  | +LIMK |    |
| GW459057A | BDP-00006242 | < | 5 | <5 | 0 | 100 | -5.8528 | -0.2901 | +DMSO |  | < | 5      | <5       | 0 | 100 | -655.86 | -1.2129 | +LIMK |  |
| GW743024X | BDP-00006243 | < | 5 | <5 | 0 | 100 | -0.477  | 0.1578  | +DMSO |  | < | 5      | <5       | 0 | 100 | -1.0919 | 0.0909  | +LIMK |  |
| GW782907X | BDP-00006244 | < | 5 | <5 | 0 | 100 | -12.07  | -0.1379 | +DMSO |  | = | 5.01   | 9.773205 | 0 | 100 | -7.3528 | 0.6034  | +LIMK |  |

|           |              |   |   |    |   |     |         |         |       |       |   |   |    |   |     |         |         |       |       |
|-----------|--------------|---|---|----|---|-----|---------|---------|-------|-------|---|---|----|---|-----|---------|---------|-------|-------|
| GW782912X | BDP-00006245 | < | 5 | <5 | 0 | 100 | -26.046 | -0.7865 | +DMSO |       | < | 5 | <5 | 0 | 100 | -1.7806 | -0.1393 | +LIMK |       |
| GW785974X | BDP-00006246 | < | 5 | <5 | 0 | 100 | -11.798 | -0.2236 | +DMSO |       | < | 5 | <5 | 0 | 100 | -10.137 | -0.0324 | +LIMK |       |
| GW796920X | BDP-00006247 | < | 5 | <5 | 0 | 100 | -7.2772 | -0.2132 | +DMSO |       | < | 5 | <5 | 0 | 100 | -10.545 | -0.0352 | +LIMK |       |
| GW796921X | BDP-00006248 | < | 5 | <5 | 0 | 100 | -67.382 | -0.1048 | +DMSO |       | < | 5 | <5 | 0 | 100 | -290.25 | -0.3788 | +LIMK |       |
| GW806776X | BDP-00006249 | < | 5 | <5 | 0 | 100 | -3.3516 | -0.2153 | +DMSO | [IMG] | < | 5 | <5 | 0 | 100 | -0.4519 | 0.0326  | +LIMK | [IMG] |
| GW701032X | BDP-00006250 | < | 5 | <5 | 0 | 100 | -7.0958 | -0.3054 | +DMSO |       | < | 5 | <5 | 0 | 100 | -9.9286 | -0.296  | +LIMK |       |

|            |              |   |   |    |   |     |         |         |       |                                                                                     |   |        |         |   |     |         |         |       |                                                                                       |
|------------|--------------|---|---|----|---|-----|---------|---------|-------|-------------------------------------------------------------------------------------|---|--------|---------|---|-----|---------|---------|-------|---------------------------------------------------------------------------------------|
| GW708893X  | BDP-00006251 | < | 5 | <5 | 0 | 100 | -123.62 | -0.0435 | +DMSO | 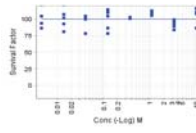   | > | 8.3372 | >8.3372 | 0 | 100 | 10.514  | -0.202  | +LIMK |    |
| GW734508X  | BDP-00006252 | < | 5 | <5 | 0 | 100 | -3.7797 | -0.6028 | +DMSO |    | < | 5      | <5      | 0 | 100 | -9.4452 | -0.2024 | +LIMK |    |
| GW607117X  | BDP-00006253 | < | 5 | <5 | 0 | 100 | -0.3855 | 0.0249  | +DMSO |    | < | 5      | <5      | 0 | 100 | -0.766  | 0.0564  | +LIMK |    |
| GW856804X  | BDP-00006254 | < | 5 | <5 | 0 | 100 | -21.793 | -0.3151 | +DMSO |  | > | 8.3372 | >8.3372 | 0 | 100 | 4.229   | -1.8474 | +LIMK |  |
| GSK237701A | BDP-00006256 | < | 5 | <5 | 0 | 100 | 42.534  | -15.208 | +DMSO |  | < | 5      | <5      | 0 | 100 | 3.7416  | -13.038 | +LIMK |  |
| GSK326090A | BDP-00006259 | < | 5 | <5 | 0 | 100 | -11.792 | -0.5584 | +DMSO |  | < | 5      | <5      | 0 | 100 | -12.332 | -0.2917 | +LIMK |  |

|            |              |   |        |          |   |     |         |         |       |                                                                                     |   |   |    |   |     |         |         |       |                                                                                       |
|------------|--------------|---|--------|----------|---|-----|---------|---------|-------|-------------------------------------------------------------------------------------|---|---|----|---|-----|---------|---------|-------|---------------------------------------------------------------------------------------|
| GSK326090A | BDP-00006259 | < | 5      | <5       | 0 | 100 | 4.1568  | -3.633  | +DMSO | 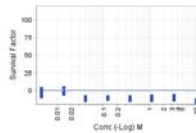   | < | 5 | <5 | 0 | 100 | 8.2997  | -8.0656 | +LIMK |    |
| GSK571989A | BDP-00006260 | < | 5      | <5       | 0 | 100 | -283.05 | -0.3121 | +DMSO |    | < | 5 | <5 | 0 | 100 | -567.29 | -0.8186 | +LIMK |    |
| GSK571989A | BDP-00006260 | < | 5      | <5       | 0 | 100 | 21.497  | -2.6174 | +DMSO |    | < | 5 | <5 | 0 | 100 | 7.3824  | -4.7146 | +LIMK |    |
| GSK579289A | BDP-00006261 | = | 5.0106 | 9.759433 | 0 | 100 | -16.838 | 0.4828  | +DMSO |  | < | 5 | <5 | 0 | 100 | -14.094 | 0.242   | +LIMK |  |
| GSK579289A | BDP-00006261 | < | 5      | <5       | 0 | 100 | 2.6639  | -33.376 | +DMSO |  | < | 5 | <5 | 0 | 100 | 7.5394  | -26.932 | +LIMK |  |
| GSK180736A | BDP-00006265 | < | 5      | <5       | 0 | 100 | -41.064 | -0.0971 | +DMSO |  | < | 5 | <5 | 0 | 100 | -448.06 | -1.9731 | +LIMK |  |



|            |              |   |   |    |   |     |         |         |       |                                                                                     |   |        |         |   |     |         |         |       |                                                                                       |
|------------|--------------|---|---|----|---|-----|---------|---------|-------|-------------------------------------------------------------------------------------|---|--------|---------|---|-----|---------|---------|-------|---------------------------------------------------------------------------------------|
| GSK270822A | BDP-00006266 | < | 5 | <5 | 0 | 100 | -1.6117 | 0.4831  | +DMSO | 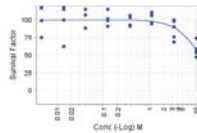   | = | 5.1442 | 7.17477 | 0 | 100 | -0.9384 | 0.5453  | +LIMK |    |
| GSK299115A | BDP-00006267 | < | 5 | <5 | 0 | 100 | -1.608  | -0.1682 | +DMSO |    | < | 5      | <5      | 0 | 100 | -11.658 | -0.3468 | +LIMK |    |
| GSK466317A | BDP-00006269 | < | 5 | <5 | 0 | 100 | -2.7436 | 0.3186  | +DMSO |    | < | 5      | <5      | 0 | 100 | -13.906 | 0.348   | +LIMK |    |
| GW461104A  | BDP-00006270 | < | 5 | <5 | 0 | 100 | -11.392 | 0.0811  | +DMSO |  | < | 5      | <5      | 0 | 100 | -12.112 | 0.1731  | +LIMK |  |
| GW569530A  | BDP-00006271 | < | 5 | <5 | 0 | 100 | -322.9  | -0.1331 | +DMSO |  | < | 5      | <5      | 0 | 100 | -11.072 | -0.0376 | +LIMK |  |
| GR105659X  | BDP-00006272 | < | 5 | <5 | 0 | 100 | -12.532 | 0.0327  | +DMSO |  | < | 5      | <5      | 0 | 100 | -13.179 | -0.1032 | +LIMK |  |

|           |              |   |   |    |   |     |         |         |       |                                                                                     |   |        |          |   |     |         |         |       |                                                                                       |
|-----------|--------------|---|---|----|---|-----|---------|---------|-------|-------------------------------------------------------------------------------------|---|--------|----------|---|-----|---------|---------|-------|---------------------------------------------------------------------------------------|
| GW275616X | BDP-00006273 | < | 5 | <5 | 0 | 100 | -39.114 | -0.6047 | +DMSO | 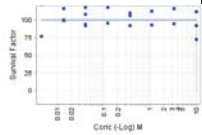   | < | 5      | <5       | 0 | 100 | -11.983 | 0.0183  | +LIMK |    |
| GW278681X | BDP-00006274 | < | 5 | <5 | 0 | 100 | -12.645 | 0.1399  | +DMSO |    | < | 5      | <5       | 0 | 100 | -13.769 | 0.4044  | +LIMK |    |
| GW284408X | BDP-00006275 | < | 5 | <5 | 0 | 100 | -440.67 | -0.252  | +DMSO |    | > | 8.3372 | >8.3372  | 0 | 100 | 11.217  | 0.0369  | +LIMK |    |
| GW301789X | BDP-00006276 | < | 5 | <5 | 0 | 100 | -0.3039 | 0.0346  | +DMSO |  | < | 5      | <5       | 0 | 100 | -0.3554 | 0.132   | +LIMK |  |
| GW441756X | BDP-00006277 | < | 5 | <5 | 0 | 100 | -561.34 | -1.1388 | +DMSO |  | < | 5      | <5       | 0 | 100 | -9.7525 | -0.2968 | +LIMK |  |
| GW441756X | BDP-00006277 | < | 5 | <5 | 0 | 100 | -11.779 | -0.069  | +DMSO |  | = | 5.0499 | 8.913817 | 0 | 100 | -3.7858 | 0.5774  | +LIMK |  |

|           |              |   |        |         |   |     |         |         |       |                                                                                     |   |   |    |   |     |         |         |       |                                                                                       |
|-----------|--------------|---|--------|---------|---|-----|---------|---------|-------|-------------------------------------------------------------------------------------|---|---|----|---|-----|---------|---------|-------|---------------------------------------------------------------------------------------|
| GW442130X | BDP-00006278 | < | 5      | <5      | 0 | 100 | -1.3151 | -0.255  | +DMSO | 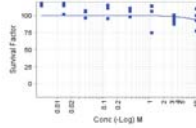   | < | 5 | <5 | 0 | 100 | -1.4452 | 0.5714  | +LIMK |    |
| GW679410X | BDP-00006284 | < | 5      | <5      | 0 | 100 | -1.4402 | 0.0467  | +DMSO |    | < | 5 | <5 | 0 | 100 | -12.476 | -0.1165 | +LIMK |    |
| GW680975X | BDP-00006285 | < | 5      | <5      | 0 | 100 | -573.57 | -0.3053 | +DMSO |    | < | 5 | <5 | 0 | 100 | -11.518 | -0.1966 | +LIMK |    |
| GW682841X | BDP-00006286 | < | 5      | <5      | 0 | 100 | -18.505 | -1.6269 | +DMSO |  | < | 5 | <5 | 0 | 100 | -191.05 | -1.3243 | +LIMK |  |
| GW695874X | BDP-00006287 | > | 8.3372 | >8.3372 | 0 | 100 | 4.9489  | -3.2088 | +DMSO |  | < | 5 | <5 | 0 | 100 | -12.074 | -1.3888 | +LIMK |  |
| GW711782X | BDP-00006288 | < | 5      | <5      | 0 | 100 | -10.892 | -0.3227 | +DMSO |  | < | 5 | <5 | 0 | 100 | -11.713 | -0.2522 | +LIMK |  |

|            |              |   |   |    |   |     |         |         |       |                                                                                     |   |       |          |   |     |         |         |       |                                                                                       |
|------------|--------------|---|---|----|---|-----|---------|---------|-------|-------------------------------------------------------------------------------------|---|-------|----------|---|-----|---------|---------|-------|---------------------------------------------------------------------------------------|
| GW410563A  | BDP-00006289 | < | 5 | <5 | 0 | 100 | -12.244 | -0.0152 | +DMSO | 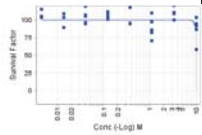   | < | 5     | <5       | 0 | 100 | -2.4144 | 0.1366  | +LIMK |    |
| GW654652C  | BDP-00006291 | < | 5 | <5 | 0 | 100 | -11.965 | -0.5467 | +DMSO |    | < | 5     | <5       | 0 | 100 | -1.8026 | -0.4931 | +LIMK |    |
| GW770220A  | BDP-00006292 | < | 5 | <5 | 0 | 100 | -2.0148 | -0.0694 | +DMSO |    | < | 5     | <5       | 0 | 100 | -1.294  | 0.2736  | +LIMK |    |
| GW771127A  | BDP-00006293 | < | 5 | <5 | 0 | 100 | -1.7564 | 0.2561  | +DMSO |   | = | 5.153 | 7.030964 | 0 | 100 | -1.9906 | 0.5331  | +LIMK |   |
| GSK953913A | BDP-00006294 | < | 5 | <5 | 0 | 100 | -22.429 | -1.805  | +DMSO |  | < | 5     | <5       | 0 | 100 | -1.0649 | -0.1208 | +LIMK |  |
| GSK980961A | BDP-00006295 | < | 5 | <5 | 0 | 100 | -3.5816 | -0.1421 | +DMSO |  | < | 5     | <5       | 0 | 100 | -572.37 | -0.3613 | +LIMK |  |

|            |              |   |   |    |   |     |         |         |       |                                                                                     |   |        |          |   |     |         |        |       |                                                                                       |
|------------|--------------|---|---|----|---|-----|---------|---------|-------|-------------------------------------------------------------------------------------|---|--------|----------|---|-----|---------|--------|-------|---------------------------------------------------------------------------------------|
| GW830365A  | BDP-00006299 | < | 5 | <5 | 0 | 100 | -1.9632 | 0.1801  | +DMSO | 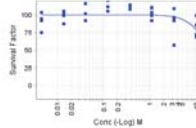   | < | 5      | <5       | 0 | 100 | -3.4352 | 0.2689 | +LIMK |    |
| GW830900A  | BDP-00006300 | < | 5 | <5 | 0 | 100 | -1.0065 | 0.0374  | +DMSO |    | < | 5      | <5       | 0 | 100 | -1.4701 | 0.5342 | +LIMK |    |
| GSK248233A | BDP-00006301 | < | 5 | <5 | 0 | 100 | -2.2014 | -0.0708 | +DMSO |    | < | 5      | <5       | 0 | 100 | -0.527  | 0.302  | +LIMK |    |
| GSK269962B | BDP-00006302 | < | 5 | <5 | 0 | 100 | -0.328  | 0.1554  | +DMSO |   |   | 5.0131 | 9.703561 | 0 | 100 | -0.5309 | 0.638  | +LIMK |   |
| GW589961A  | BDP-00006303 | < | 5 | <5 | 0 | 100 | -1.6352 | 0.0002  | +DMSO |  | < | 5      | <5       | 0 | 100 | -0.8574 | 0.0821 | +LIMK |  |
| GW659386A  | BDP-00006305 | < | 5 | <5 | 0 | 100 | -1.5594 | 0.1623  | +DMSO |  | < | 5      | <5       | 0 | 100 | -20.304 | 0.1711 | +LIMK |  |

|             |              |   |        |         |   |     |         |         |       |                                                                                     |   |        |          |   |     |         |         |       |                                                                                       |
|-------------|--------------|---|--------|---------|---|-----|---------|---------|-------|-------------------------------------------------------------------------------------|---|--------|----------|---|-----|---------|---------|-------|---------------------------------------------------------------------------------------|
| GW680908A   | BDP-00006307 | < | 5      | <5      | 0 | 100 | -59.237 | -0.2992 | +DMSO | 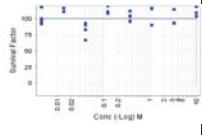   | > | 8.3372 | >8.3372  | 0 | 100 | 0.0057  | -0.0003 | +LIMK |    |
| GW693917A   | BDP-00006309 | < | 5      | <5      | 0 | 100 | -283.42 | -2.5784 | +DMSO |    | > | 8.3372 | >8.3372  | 0 | 100 | 4.8887  | -2.2481 | +LIMK |    |
| GW694590A   | BDP-00006311 | > | 8.3372 | >8.3372 | 0 | 100 | 2.4949  | -0.0365 | +DMSO |    | < | 5      | <5       | 0 | 100 | -9.5533 | -0.6785 | +LIMK |    |
| GW700494A   | BDP-00006312 | < | 5      | <5      | 0 | 100 | -0.7415 | 0.3143  | +DMSO |  | = | 5.4295 | 3.719627 | 0 | 100 | -27.052 | 0.8569  | +LIMK |  |
| GSK1030059A | BDP-00006317 | < | 5      | <5      | 0 | 100 | -44.241 | -2.1686 | +DMSO |  | > | 8.3372 | >8.3372  | 0 | 100 | 4.9637  | -2.911  | +LIMK |  |
| GSK1030061A | BDP-00006318 | < | 5      | <5      | 0 | 100 | -240.93 | -0.8379 | +DMSO |  | < | 5      | <5       | 0 | 100 | -11.47  | -0.4809 | +LIMK |  |

|             |              |   |        |         |   |     |         |         |       |                                                                                     |   |        |         |   |     |         |         |       |                                                                                       |
|-------------|--------------|---|--------|---------|---|-----|---------|---------|-------|-------------------------------------------------------------------------------------|---|--------|---------|---|-----|---------|---------|-------|---------------------------------------------------------------------------------------|
| GSK1030062A | BDP-00006319 | < | 5      | <5      | 0 | 100 | -16.633 | -0.5739 | +DMSO | 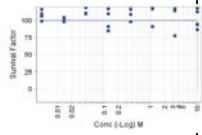   | < | 5      | <5      | 0 | 100 | -9.4005 | -0.2767 | +LIMK |    |
| GSK204925A  | BDP-00006320 | < | 5      | <5      | 0 | 100 | -11.161 | -1.1518 | +DMSO |    | < | 5      | <5      | 0 | 100 | -2.1984 | -0.3718 | +LIMK |    |
| GW804482X   | BDP-00006322 | > | 8.3372 | >8.3372 | 0 | 100 | 10.864  | -0.2269 | +DMSO |   | < | 5      | <5      | 0 | 100 | -13.97  | -1.1251 | +LIMK |   |
| GW853609X   | BDP-00006324 | > | 8.3372 | >8.3372 | 0 | 100 | 3.618   | -0.0371 | +DMSO |  | > | 8.3372 | >8.3372 | 0 | 100 | 0.5215  | 0.009   | +LIMK |  |
| GW693481X   | BDP-00006325 | < | 5      | <5      | 0 | 100 | -165.36 | -1.6782 | +DMSO |  | < | 5      | <5      | 0 | 100 | -65.089 | -0.7392 | +LIMK |  |
| GW780159X   | BDP-00006326 | < | 5      | <5      | 0 | 100 | -334.02 | -0.385  | +DMSO |  | < | 5      | <5      | 0 | 100 | -529.68 | -0.6637 | +LIMK |  |

|             |              |   |   |    |   |     |         |         |       |                                                                                     |   |        |         |   |     |         |         |       |                                                                                       |
|-------------|--------------|---|---|----|---|-----|---------|---------|-------|-------------------------------------------------------------------------------------|---|--------|---------|---|-----|---------|---------|-------|---------------------------------------------------------------------------------------|
| GW785804X   | BDP-00006327 | < | 5 | <5 | 0 | 100 | -4.0497 | 0.0158  | +DMSO | 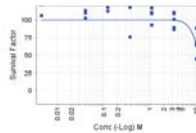   | = | 5.0047 | 9.89321 | 0 | 100 | -16.904 | 0.5889  | +LIMK |    |
| GW786460X   | BDP-00006328 | < | 5 | <5 | 0 | 100 | -72.281 | -0.4615 | +DMSO |    | < | 5      | <5      | 0 | 100 | -97.769 | -0.4585 | +LIMK |    |
| GSK554170A  | BDP-00006329 | < | 5 | <5 | 0 | 100 | -1.1961 | 0.5857  | +DMSO |    | < | 5      | <5      | 0 | 100 | -0.7901 | 0.5134  | +LIMK |    |
| GSK561868B  | BDP-00006330 | < | 5 | <5 | 0 | 100 | -160.39 | -0.4834 | +DMSO |  | > | 8.3372 | >8.3372 | 0 | 100 | 3.5266  | -0.532  | +LIMK |  |
| SB-759335-B | BDP-00006334 | < | 5 | <5 | 0 | 100 | -1.0418 | -0.055  | +DMSO |  | < | 5      | <5      | 0 | 100 | -1.0332 | 0.1295  | +LIMK |  |
| SB-431533   | BDP-00006336 | < | 5 | <5 | 0 | 100 | -11.457 | 0.06    | +DMSO |  | < | 5      | <5      | 0 | 100 | -12.65  | 0.5663  | +LIMK |  |



|             |              |   |   |    |   |     |         |         |       |                                                                                     |   |        |         |   |     |         |         |       |                                                                                       |
|-------------|--------------|---|---|----|---|-----|---------|---------|-------|-------------------------------------------------------------------------------------|---|--------|---------|---|-----|---------|---------|-------|---------------------------------------------------------------------------------------|
| SB-431542-A | BDP-00006337 | < | 5 | <5 | 0 | 100 | -14.076 | -1.2851 | +DMSO | 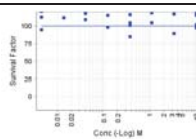   | < | 5      | <5      | 0 | 100 | -570.85 | -1.0537 | +LIMK |    |
| SKF-86055   | BDP-00006338 | < | 5 | <5 | 0 | 100 | -3.1279 | -0.0791 | +DMSO |    | > | 8.3372 | >8.3372 | 0 | 100 | 1.7689  | 0.0286  | +LIMK |    |
| GR269666A   | BDP-00006342 | < | 5 | <5 | 0 | 100 | -114.16 | -0.3366 | +DMSO |   | < | 5      | <5      | 0 | 100 | -2.8179 | -0.223  | +LIMK |   |
| GW282449A   | BDP-00006343 | < | 5 | <5 | 0 | 100 | -12.018 | 0.0773  | +DMSO |  | < | 5      | <5      | 0 | 100 | -8.1945 | -0.3032 | +LIMK |  |
| GW282974X   | BDP-00006344 | < | 5 | <5 | 0 | 100 | -40.946 | -0.1199 | +DMSO |  | < | 5      | <5      | 0 | 100 | -12.442 | -0.5249 | +LIMK |  |
| GW301888X   | BDP-00006345 | < | 5 | <5 | 0 | 100 | -11.017 | -0.2018 | +DMSO |  | < | 5      | <5      | 0 | 100 | -2.767  | 0.4983  | +LIMK |  |

|           |              |   |   |    |   |     |         |         |       |                                                                                     |   |        |          |   |     |         |         |       |                                                                                       |
|-----------|--------------|---|---|----|---|-----|---------|---------|-------|-------------------------------------------------------------------------------------|---|--------|----------|---|-----|---------|---------|-------|---------------------------------------------------------------------------------------|
| GW632580X | BDP-00006346 | < | 5 | <5 | 0 | 100 | -1.3227 | 0.2119  | +DMSO | 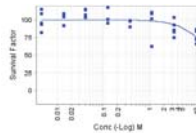   | < | 5      | <5       | 0 | 100 | -3.2917 | 0.4688  | +LIMK |    |
| GW820759X | BDP-00006347 | < | 5 | <5 | 0 | 100 | -363.58 | -0.414  | +DMSO |    | < | 5      | <5       | 0 | 100 | -1.3201 | 0.0042  | +LIMK |    |
| GW782612X | BDP-00006350 | < | 5 | <5 | 0 | 100 | -1.9043 | 0.4307  | +DMSO |    | = | 5.0623 | 8.663061 | 0 | 100 | -3.6473 | 0.74    | +LIMK |    |
| GW642125X | BDP-00006351 | < | 5 | <5 | 0 | 100 | -14.864 | -0.2796 | +DMSO |  | > | 8.3372 | >8.3372  | 0 | 100 | 3.5021  | -0.4977 | +LIMK |  |
| GW642138X | BDP-00006352 | < | 5 | <5 | 0 | 100 | -10.409 | -0.324  | +DMSO |  | < | 5      | <5       | 0 | 100 | -15.2   | -1.6304 | +LIMK |  |
| GW513184X | BDP-00006353 | < | 5 | <5 | 0 | 100 | -11.14  | -0.8745 | +DMSO |  | < | 5      | <5       | 0 | 100 | -14.164 | 0.3055  | +LIMK |  |

|           |              |   |   |    |   |     |         |         |       |                                                                                     |   |        |         |   |     |         |         |       |                                                                                       |
|-----------|--------------|---|---|----|---|-----|---------|---------|-------|-------------------------------------------------------------------------------------|---|--------|---------|---|-----|---------|---------|-------|---------------------------------------------------------------------------------------|
| GW578748X | BDP-00006354 | < | 5 | <5 | 0 | 100 | -9.8927 | -1.0689 | +DMSO | 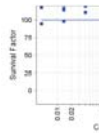   | < | 5      | <5      | 0 | 100 | -11.855 | -0.417  | +LIMK |    |
| GW643971X | BDP-00006355 | < | 5 | <5 | 0 | 100 | -10.425 | -0.0458 | +DMSO |    | > | 8.3372 | >8.3372 | 0 | 100 | 0.0657  | 0.0001  | +LIMK |    |
| GW794607X | BDP-00006358 | < | 5 | <5 | 0 | 100 | -11.384 | -0.1587 | +DMSO |    | > | 8.3372 | >8.3372 | 0 | 100 | 2.6688  | -0.3228 | +LIMK |    |
| GW809885X | BDP-00006359 | < | 5 | <5 | 0 | 100 | -110.35 | -0.3026 | +DMSO |  | < | 5      | <5      | 0 | 100 | -22.854 | -1.041  | +LIMK |  |
| GW811168X | BDP-00006360 | < | 5 | <5 | 0 | 100 | -11.797 | -2.5371 | +DMSO |  | < | 5      | <5      | 0 | 100 | -250.24 | -0.5878 | +LIMK |  |
| GW817394X | BDP-00006361 | < | 5 | <5 | 0 | 100 | -602.85 | -0.4341 | +DMSO |  | < | 5      | <5      | 0 | 100 | -2.8746 | 0.0136  | +LIMK |  |

|             |              |   |        |          |   |     |         |         |       |                                                                                     |   |        |         |   |     |         |         |       |                                                                                       |
|-------------|--------------|---|--------|----------|---|-----|---------|---------|-------|-------------------------------------------------------------------------------------|---|--------|---------|---|-----|---------|---------|-------|---------------------------------------------------------------------------------------|
| GW817396X   | BDP-00006362 | < | 5      | <5       | 0 | 100 | -127.06 | -0.3773 | +DMSO | 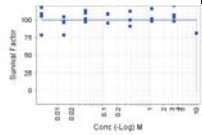   | < | 5      | <5      | 0 | 100 | -351.96 | -1.1687 | +LIMK |    |
| GW829874X   | BDP-00006363 | > | 8.3372 | >8.3372  | 0 | 100 | 2.4     | -0.103  | +DMSO |    | < | 5      | <5      | 0 | 100 | -2.8192 | -0.0891 | +LIMK |    |
| GW829877X   | BDP-00006364 | < | 5      | <5       | 0 | 100 | -11.087 | -0.1809 | +DMSO |    | < | 5      | <5      | 0 | 100 | -10.872 | -0.0451 | +LIMK |    |
| SB-772077-B | BDP-00006365 | < | 5      | <5       | 0 | 100 | -1.0921 | 0.2674  | +DMSO |  | < | 5      | <5      | 0 | 100 | -3.3794 | 0.2939  | +LIMK |  |
| GW801372X   | BDP-00006366 | < | 5      | <5       | 0 | 100 | -6.0427 | -0.6452 | +DMSO |  | < | 5      | <5      | 0 | 100 | -1.4624 | -0.1188 | +LIMK |  |
| GW801372X   | BDP-00006366 | = | 8.1644 | 0.006848 | 0 | 100 | -1.1388 | 0.7215  | +DMSO |  | > | 8.3372 | >8.3372 | 0 | 100 | -0.6224 | 0.2484  | +LIMK |  |

|           |              |   |        |         |   |     |         |         |       |                                                                                     |   |        |          |   |     |         |         |       |                                                                                       |
|-----------|--------------|---|--------|---------|---|-----|---------|---------|-------|-------------------------------------------------------------------------------------|---|--------|----------|---|-----|---------|---------|-------|---------------------------------------------------------------------------------------|
| GW807982X | BDP-00006368 | < | 5      | <5      | 0 | 100 | -1.3312 | -0.0378 | +DMSO | 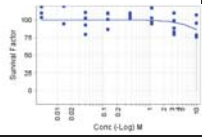   | < | 5      | <5       | 0 | 100 | -11.999 | 0.009   | +LIMK |    |
| GW810576X | BDP-00006370 | < | 5      | <5      | 0 | 100 | 27.616  | -15.781 | +DMSO |    | < | 5      | <5       | 0 | 100 | 4.9582  | -5.5505 | +LIMK |    |
| GW811761X | BDP-00006371 | > | 8.3372 | >8.3372 | 0 | 100 | 2.0937  | -0.5323 | +DMSO |    | < | 5      | <5       | 0 | 100 | -10.658 | -0.2374 | +LIMK |    |
| GW819077X | BDP-00006372 | < | 5      | <5      | 0 | 100 | -2.5623 | -0.9282 | +DMSO |  | < | 5      | <5       | 0 | 100 | -61.987 | -0.6348 | +LIMK |  |
| GW827099X | BDP-00006373 | < | 5      | <5      | 0 | 100 | -7.2642 | -0.6929 | +DMSO |  | < | 5      | <5       | 0 | 100 | -11.986 | -0.349  | +LIMK |  |
| GW827102X | BDP-00006374 | < | 5      | <5      | 0 | 100 | -8.7561 | 0.0534  | +DMSO |  | = | 5.1133 | 7.703917 | 0 | 100 | -1.6801 | 0.5838  | +LIMK |  |

|           |              |   |        |         |   |     |         |         |       |                                                                                     |   |        |         |   |     |         |         |       |                                                                                       |
|-----------|--------------|---|--------|---------|---|-----|---------|---------|-------|-------------------------------------------------------------------------------------|---|--------|---------|---|-----|---------|---------|-------|---------------------------------------------------------------------------------------|
| GW827105X | BDP-00006375 | < | 5      | <5      | 0 | 100 | -30.785 | -0.8399 | +DMSO | 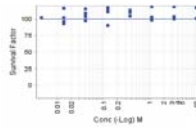   | < | 5      | <5      | 0 | 100 | -576.81 | -0.4647 | +LIMK |    |
| GW827396X | BDP-00006377 | > | 8.3372 | >8.3372 | 0 | 100 | 4.3323  | -1.8627 | +DMSO |    | > | 8.3372 | >8.3372 | 0 | 100 | 1.6899  | -0.3475 | +LIMK |    |
| GW828525X | BDP-00006378 | < | 5      | <5      | 0 | 100 | -11.666 | -0.6583 | +DMSO |    | < | 5      | <5      | 0 | 100 | -488.15 | -0.4784 | +LIMK |    |
| GW828529X | BDP-00006379 | < | 5      | <5      | 0 | 100 | -5.3261 | -1.6453 | +DMSO |  | < | 5      | <5      | 0 | 100 | -269.66 | -0.3401 | +LIMK |  |
| GW829055X | BDP-00006380 | < | 5      | <5      | 0 | 100 | -40.924 | -1.1517 | +DMSO |  | < | 5      | <5      | 0 | 100 | -624.47 | -1.1415 | +LIMK |  |
| GW829115X | BDP-00006381 | < | 5      | <5      | 0 | 100 | -1.0403 | -0.0691 | +DMSO |  | < | 5      | <5      | 0 | 100 | -38.949 | -0.2669 | +LIMK |  |

|           |              |   |        |         |   |     |         |         |       |                                                                                     |   |        |         |   |     |         |         |       |                                                                                       |
|-----------|--------------|---|--------|---------|---|-----|---------|---------|-------|-------------------------------------------------------------------------------------|---|--------|---------|---|-----|---------|---------|-------|---------------------------------------------------------------------------------------|
| GW832467X | BDP-00006383 | < | 5      | <5      | 0 | 100 | -356.56 | -0.4215 | +DMSO | 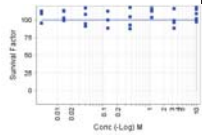   | < | 5      | <5      | 0 | 100 | -13.515 | 0.2399  | +LIMK |    |
| GW833373X | BDP-00006384 | < | 5      | <5      | 0 | 100 | -34.843 | -1.5868 | +DMSO |    | < | 5      | <5      | 0 | 100 | -14.423 | -0.8641 | +LIMK |    |
| GW284372X | BDP-00006385 | < | 5      | <5      | 0 | 100 | -11.867 | -0.0111 | +DMSO |    | = | 5.0743 | 8.42814 | 0 | 100 | -4.2051 | 0.6193  | +LIMK |    |
| GW458787A | BDP-00006386 | < | 5      | <5      | 0 | 100 | -2.5188 | -0.0198 | +DMSO |  | < | 5      | <5      | 0 | 100 | -1.5248 | 0.5342  | +LIMK |  |
| GW566221A | BDP-00006387 | < | 5      | <5      | 0 | 100 | -5.2971 | -0.243  | +DMSO |  | < | 5      | <5      | 0 | 100 | -4.1931 | -0.0951 | +LIMK |  |
| GW567808A | BDP-00006388 | > | 8.3372 | >8.3372 | 0 | 100 | 1.2252  | 0.0065  | +DMSO |  | < | 5      | <5      | 0 | 100 | -0.8885 | 0.1122  | +LIMK |  |

|           |              |   |        |         |   |     |         |         |       |                                                                                     |   |   |    |   |     |         |         |       |                                                                                       |
|-----------|--------------|---|--------|---------|---|-----|---------|---------|-------|-------------------------------------------------------------------------------------|---|---|----|---|-----|---------|---------|-------|---------------------------------------------------------------------------------------|
| GW568377A | BDP-00006389 | > | 8.3372 | >8.3372 | 0 | 100 | 2.8049  | -0.452  | +DMSO | 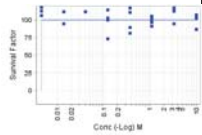   | < | 5 | <5 | 0 | 100 | -1.098  | 0.3224  | +LIMK |    |
| GW574782A | BDP-00006390 | < | 5      | <5      | 0 | 100 | -237.66 | -0.5041 | +DMSO |    | < | 5 | <5 | 0 | 100 | -2.0841 | -0.2669 | +LIMK |    |
| GW576609A | BDP-00006393 | < | 5      | <5      | 0 | 100 | -0.9397 | 0.3349  | +DMSO |    | < | 5 | <5 | 0 | 100 | -0.6375 | 0.2616  | +LIMK |    |
| GW576924A | BDP-00006394 | > | 8.3372 | >8.3372 | 0 | 100 | 2.5169  | -0.3128 | +DMSO |   | < | 5 | <5 | 0 | 100 | -1.8735 | -0.1116 | +LIMK |   |
| GW580496A | BDP-00006395 | < | 5      | <5      | 0 | 100 | -12.248 | -0.0075 | +DMSO |  | < | 5 | <5 | 0 | 100 | -2.3235 | 0.1451  | +LIMK |  |
| GW583373A | BDP-00006396 | < | 5      | <5      | 0 | 100 | -34.387 | -0.0551 | +DMSO |  | < | 5 | <5 | 0 | 100 | -12.388 | 0.1243  | +LIMK |  |



|             |              |   |        |         |   |     |         |         |       |                                                                                     |   |        |          |   |     |         |        |       |                                                                                       |
|-------------|--------------|---|--------|---------|---|-----|---------|---------|-------|-------------------------------------------------------------------------------------|---|--------|----------|---|-----|---------|--------|-------|---------------------------------------------------------------------------------------|
| GW615311X   | BDP-00006397 | < | 5      | <5      | 0 | 100 | -1.4412 | 0.1916  | +DMSO | 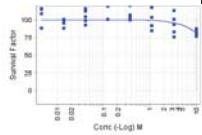   | < | 5      | <5       | 0 | 100 | -4.7589 | 0.4595 | +LIMK |    |
| GW616030X   | BDP-00006398 | < | 5      | <5      | 0 | 100 | -1.1524 | 0.0316  | +DMSO |    | < | 5      | <5       | 0 | 100 | -0.7808 | 0.3479 | +LIMK |    |
| GW621823A   | BDP-00006399 | < | 5      | <5      | 0 | 100 | -0.8227 | 0.2812  | +DMSO |    | < | 5      | <5       | 0 | 100 | -0.4161 | 0.3879 | +LIMK |    |
| GW633459A   | BDP-00006400 | < | 5      | <5      | 0 | 100 | -11.303 | -0.0684 | +DMSO |  | < | 5      | <5       | 0 | 100 | -11.266 | 0.0175 | +LIMK |  |
| GSK2219385A | BDP-00006404 | < | 5      | <5      | 0 | 100 | -1.5903 | 0.6002  | +DMSO |  | = | 5.5622 | 2.740162 | 0 | 100 | -0.6856 | 0.593  | +LIMK |  |
| GSK1819799A | BDP-00006406 | > | 8.3372 | >8.3372 | 0 | 100 | 3.3006  | -0.611  | +DMSO |  | < | 5      | <5       | 0 | 100 | -10.437 | -0.122 | +LIMK |  |

|           |              |   |   |    |   |     |         |         |       |                                                                                    |   |        |          |   |     |         |         |       |                                                                                      |
|-----------|--------------|---|---|----|---|-----|---------|---------|-------|------------------------------------------------------------------------------------|---|--------|----------|---|-----|---------|---------|-------|--------------------------------------------------------------------------------------|
| SB-437013 | BDP-00006411 | < | 5 | <5 | 0 | 100 | -405.53 | -0.0812 | +DMSO | 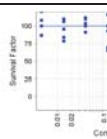  | > | 8.3372 | >8.3372  | 0 | 100 | 1.6325  | 0.0661  | +LIMK |   |
| SB-630812 | BDP-00006412 | < | 5 | <5 | 0 | 100 | -11.48  | -0.1136 | +DMSO |   | < | 5      | <5       | 0 | 100 | -12.712 | -0.0004 | +LIMK |   |
| SB-633825 | BDP-00006413 | < | 5 | <5 | 0 | 100 | -25.548 | -0.3934 | +DMSO |   | < | 5      | <5       | 0 | 100 | -16.449 | -0.4811 | +LIMK |   |
| SB-633825 | BDP-00006413 | < | 5 | <5 | 0 | 100 | -11.596 | -0.9236 | +DMSO |   | = | 5.0249 | 9.442182 | 0 | 100 | -1.9958 | 0.5516  | +LIMK |   |
| GW768505A | BDP-00006414 | < | 5 | <5 | 0 | 100 | -12.434 | -0.4106 | +DMSO |   | < | 5      | <5       | 0 | 100 | -12.41  | -0.0423 | +LIMK |   |
| GW768505A | BDP-00006414 | < | 5 | <5 | 0 | 100 | -2.4918 | 0.1946  | +DMSO |  | = | 5.4766 | 3.337568 | 0 | 100 | -27.763 | 0.7627  | +LIMK |  |

|           |              |   |        |         |   |     |         |         |       |                                                                                     |   |        |          |   |     |         |         |       |                                                                                       |
|-----------|--------------|---|--------|---------|---|-----|---------|---------|-------|-------------------------------------------------------------------------------------|---|--------|----------|---|-----|---------|---------|-------|---------------------------------------------------------------------------------------|
| GW795486X | BDP-00006416 | < | 5      | <5      | 0 | 100 | -1.5819 | -0.0095 | +DMSO | 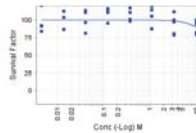   | < | 5      | <5       | 0 | 100 | -1.178  | 0.0642  | +LIMK |    |
| GW795493X | BDP-00006417 | < | 5      | <5      | 0 | 100 | -408.09 | -0.1957 | +DMSO |    | < | 5      | <5       | 0 | 100 | -0.5537 | 0.156   | +LIMK |    |
| GW275944X | BDP-00006418 | < | 5      | <5      | 0 | 100 | -2.8267 | 0.067   | +DMSO |    | < | 5      | <5       | 0 | 100 | -0.6529 | 0.378   | +LIMK |    |
| GW276655X | BDP-00006419 | < | 5      | <5      | 0 | 100 | -1.2163 | -0.1417 | +DMSO |  | = | 5.0059 | 9.865903 | 0 | 100 | -17.005 | 0.4428  | +LIMK |  |
| GW279320X | BDP-00006420 | < | 5      | <5      | 0 | 100 | -5.776  | -0.1958 | +DMSO |  | < | 5      | <5       | 0 | 100 | -366.15 | -0.3747 | +LIMK |  |
| GW280670X | BDP-00006421 | > | 8.3372 | >8.3372 | 0 | 100 | 0.2231  | 0.0132  | +DMSO |  | < | 5      | <5       | 0 | 100 | -1.3832 | 0.131   | +LIMK |  |

|           |              |   |   |    |   |     |         |         |       |                                                                                     |   |   |    |   |     |         |         |       |                                                                                       |
|-----------|--------------|---|---|----|---|-----|---------|---------|-------|-------------------------------------------------------------------------------------|---|---|----|---|-----|---------|---------|-------|---------------------------------------------------------------------------------------|
| GW282536X | BDP-00006422 | < | 5 | <5 | 0 | 100 | -41.815 | -0.1366 | +DMSO | 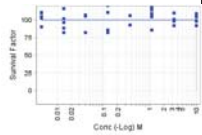   | < | 5 | <5 | 0 | 100 | -16.853 | -0.1545 | +LIMK |    |
| GW290597X | BDP-00006423 | < | 5 | <5 | 0 | 100 | -1.9106 | -0.2824 | +DMSO |    | < | 5 | <5 | 0 | 100 | -10.04  | 0.0026  | +LIMK |    |
| GW297361X | BDP-00006424 | < | 5 | <5 | 0 | 100 | -0.6082 | 0.2837  | +DMSO |   | < | 5 | <5 | 0 | 100 | -0.4628 | 0.4856  | +LIMK |   |
| GW300653X | BDP-00006425 | < | 5 | <5 | 0 | 100 | -326.83 | -0.5392 | +DMSO |  | < | 5 | <5 | 0 | 100 | -68.813 | -0.1363 | +LIMK |  |
| GW300657X | BDP-00006426 | < | 5 | <5 | 0 | 100 | -0.8939 | 0.0389  | +DMSO |  | < | 5 | <5 | 0 | 100 | -0.834  | 0.1011  | +LIMK |  |
| GW300660X | BDP-00006427 | < | 5 | <5 | 0 | 100 | -3.9035 | -0.2825 | +DMSO |  | < | 5 | <5 | 0 | 100 | -14.239 | -0.8098 | +LIMK |  |

|           |              |   |   |    |   |     |         |         |       |                                                                                     |   |        |          |   |     |         |         |       |                                                                                       |
|-----------|--------------|---|---|----|---|-----|---------|---------|-------|-------------------------------------------------------------------------------------|---|--------|----------|---|-----|---------|---------|-------|---------------------------------------------------------------------------------------|
| GW301784X | BDP-00006428 | < | 5 | <5 | 0 | 100 | -10.926 | 0.0107  | +DMSO | 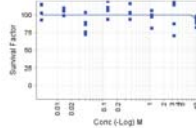   | < | 5      | <5       | 0 | 100 | -1.9255 | 0.5257  | +LIMK |    |
| GW305178X | BDP-00006429 | < | 5 | <5 | 0 | 100 | -0.183  | 0.2263  | +DMSO |    |   | 5.5093 | 3.095584 | 0 | 100 | -0.3424 | 0.3388  | +LIMK |    |
| GW335962X | BDP-00006430 | < | 5 | <5 | 0 | 100 | -11.515 | 0.0547  | +DMSO |   | < | 5      | <5       | 0 | 100 | -11.288 | 0.1125  | +LIMK |   |
| GW352430A | BDP-00006431 | < | 5 | <5 | 0 | 100 | -26.767 | -0.37   | +DMSO |  | < | 5      | <5       | 0 | 100 | -4.9194 | -0.0124 | +LIMK |  |
| GW396574X | BDP-00006432 | < | 5 | <5 | 0 | 100 | -0.2618 | 0.1895  | +DMSO |  |   | 5.1942 | 6.393848 | 0 | 100 | -0.248  | 0.3819  | +LIMK |  |
| GW416469X | BDP-00006433 | < | 5 | <5 | 0 | 100 | -67.787 | -0.2835 | +DMSO |  | < | 5      | <5       | 0 | 100 | -15.113 | -0.669  | +LIMK |  |

|           |              |   |   |    |   |     |         |         |       |                                                                                     |   |        |          |   |     |         |         |       |                                                                                       |
|-----------|--------------|---|---|----|---|-----|---------|---------|-------|-------------------------------------------------------------------------------------|---|--------|----------|---|-----|---------|---------|-------|---------------------------------------------------------------------------------------|
| SB-242717 | BDP-00006436 | < | 5 | <5 | 0 | 100 | -1.8649 | 0.2609  | +DMSO | 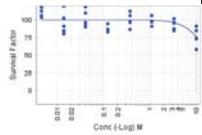   | < | 5      | <5       | 0 | 100 | -14.634 | 0.4514  | +LIMK |    |
| SB-242718 | BDP-00006437 | < | 5 | <5 | 0 | 100 | -10.726 | -0.129  | +DMSO |    | < | 5      | <5       | 0 | 100 | -11.616 | -1.1137 | +LIMK |    |
| SB-242721 | BDP-00006439 | < | 5 | <5 | 0 | 100 | -10.822 | -0.2102 | +DMSO |    | > | 8.3372 | >8.3372  | 0 | 100 | 10.676  | -0.1775 | +LIMK |    |
| SB-251527 | BDP-00006443 | < | 5 | <5 | 0 | 100 | -12.763 | 0.3491  | +DMSO |  | = | 5.0627 | 8.655472 | 0 | 100 | -4.9086 | 0.7783  | +LIMK |  |
| SB-253228 | BDP-00006445 | < | 5 | <5 | 0 | 100 | -13.476 | -0.5693 | +DMSO |  | < | 5      | <5       | 0 | 100 | -10.442 | -0.7109 | +LIMK |  |
| SB-253228 | BDP-00006445 | < | 5 | <5 | 0 | 100 | -1.2028 | 0.3682  | +DMSO |  | = | 5.2189 | 6.041413 | 0 | 100 | -3.0335 | 0.8055  | +LIMK |  |

|             |              |   |        |         |   |     |         |         |       |                                                                                     |   |        |          |   |     |         |         |       |                                                                                       |
|-------------|--------------|---|--------|---------|---|-----|---------|---------|-------|-------------------------------------------------------------------------------------|---|--------|----------|---|-----|---------|---------|-------|---------------------------------------------------------------------------------------|
| SB-254169   | BDP-00006446 | < | 5      | <5      | 0 | 100 | -3.1989 | -0.2307 | +DMSO | 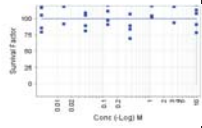   | < | 5      | <5       | 0 | 100 | -10.356 | -0.2909 | +LIMK |    |
| SB-264865   | BDP-00006447 | < | 5      | <5      | 0 | 100 | -2.6479 | -0.3003 | +DMSO |    | > | 8.3372 | >8.3372  | 0 | 100 | 0.4107  | 0.0209  | +LIMK |    |
| SB-264866   | BDP-00006448 | < | 5      | <5      | 0 | 100 | -0.8646 | 0.0124  | +DMSO |    | < | 5      | <5       | 0 | 100 | -2.3825 | -0.2186 | +LIMK |    |
| SB-278539   | BDP-00006450 | < | 5      | <5      | 0 | 100 | -12.058 | 0.0154  | +DMSO |  | < | 5      | <5       | 0 | 100 | -11.141 | 0.0144  | +LIMK |  |
| SB-278539   | BDP-00006450 | < | 5      | <5      | 0 | 100 | -3.4354 | 0.3294  | +DMSO |  | = | 5.454  | 3.515766 | 0 | 100 | -18.755 | 0.8248  | +LIMK |  |
| SB-285234-W | BDP-00006452 | > | 8.3372 | >8.3372 | 0 | 100 | 1.2419  | -0.1172 | +DMSO |  | < | 5      | <5       | 0 | 100 | -28.976 | -0.7352 | +LIMK |  |

|            |              |   |   |    |   |     |         |         |       |                                                                                     |   |        |         |   |     |         |         |       |                                                                                       |
|------------|--------------|---|---|----|---|-----|---------|---------|-------|-------------------------------------------------------------------------------------|---|--------|---------|---|-----|---------|---------|-------|---------------------------------------------------------------------------------------|
| GSK317354A | BDP-00006453 | < | 5 | <5 | 0 | 100 | -10.839 | -0.4222 | +DMSO | 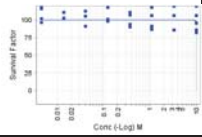   | > | 8.3372 | >8.3372 | 0 | 100 | 0.5811  | -0.0078 | +LIMK |    |
| GW561436X  | BDP-00006454 | < | 5 | <5 | 0 | 100 | -177.11 | -0.267  | +DMSO |    | < | 5      | <5      | 0 | 100 | -280.44 | -0.8115 | +LIMK |    |
| GW568326X  | BDP-00006455 | < | 5 | <5 | 0 | 100 | -3.6548 | -0.1218 | +DMSO |    | < | 5      | <5      | 0 | 100 | -9.6165 | -0.6606 | +LIMK |    |
| GW569293E  | BDP-00006456 | < | 5 | <5 | 0 | 100 | -7.3786 | -0.13   | +DMSO |  | < | 5      | <5      | 0 | 100 | -12.353 | 0.3551  | +LIMK |  |
| GW581744X  | BDP-00006457 | < | 5 | <5 | 0 | 100 | -12.72  | -1.053  | +DMSO |  | > | 8.3372 | >8.3372 | 0 | 100 | 2.5539  | -1.297  | +LIMK |  |
| SB-210313  | BDP-00006459 | < | 5 | <5 | 0 | 100 | -0.556  | -0.0028 | +DMSO |  | < | 5      | <5      | 0 | 100 | -1.427  | -0.018  | +LIMK |  |



|              |              |   |   |    |   |     |         |         |       |                                                                                     |   |        |          |   |     |         |         |       |                                                                                       |
|--------------|--------------|---|---|----|---|-----|---------|---------|-------|-------------------------------------------------------------------------------------|---|--------|----------|---|-----|---------|---------|-------|---------------------------------------------------------------------------------------|
| SB-216385    | BDP-00006460 | < | 5 | <5 | 0 | 100 | -11.898 | -0.0377 | +DMSO | 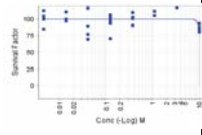   | = | 5.0071 | 9.836843 | 0 | 100 | -16.581 | 0.6067  | +LIMK |    |
| SKF-86002-A2 | BDP-00006461 | < | 5 | <5 | 0 | 100 | -2.0507 | -0.0613 | +DMSO |    | < | 5      | <5       | 0 | 100 | -449.23 | -0.3992 | +LIMK |    |
| SB-223133    | BDP-00006465 | < | 5 | <5 | 0 | 100 | -318.25 | -0.2229 | +DMSO |    | = | 5.2752 | 5.306538 | 0 | 100 | -3.6444 | 0.6522  | +LIMK |    |
| GSK200398A   | BDP-00006468 | < | 5 | <5 | 0 | 100 | -20.323 | 0.6333  | +DMSO |   | = | 5.042  | 9.07858  | 0 | 100 | -4.6633 | 0.7505  | +LIMK |   |
| GSK238583A   | BDP-00006469 | < | 5 | <5 | 0 | 100 | -1.1365 | 0.0505  | +DMSO |  | < | 5      | <5       | 0 | 100 | -1.0713 | 0.5648  | +LIMK |  |
| GSK259178A   | BDP-00006470 | < | 5 | <5 | 0 | 100 | -10.795 | -0.238  | +DMSO |  | < | 5      | <5       | 0 | 100 | -2.6966 | 0.4655  | +LIMK |  |

|            |              |   |        |         |   |     |         |         |       |                                                                                     |   |        |          |   |     |         |         |       |                                                                                       |
|------------|--------------|---|--------|---------|---|-----|---------|---------|-------|-------------------------------------------------------------------------------------|---|--------|----------|---|-----|---------|---------|-------|---------------------------------------------------------------------------------------|
| GSK259178A | BDP-00006470 | < | 5      | <5      | 0 | 100 | -1.6353 | -0.0315 | +DMSO | 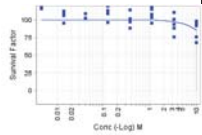   | = | 5.1717 | 6.73483  | 0 | 100 | -1.7976 | 0.6456  | +LIMK |    |
| GW784752X  | BDP-00006472 | < | 5      | <5      | 0 | 100 | -318.51 | -1.2511 | +DMSO |    | < | 5      | <5       | 0 | 100 | -289.88 | -0.6253 | +LIMK |    |
| GW813360X  | BDP-00006473 | < | 5      | <5      | 0 | 100 | -13.023 | -0.2309 | +DMSO |   | = | 5.1278 | 7.450247 | 0 | 100 | -2.3017 | 0.6127  | +LIMK |   |
| GW683003X  | BDP-00006475 | < | 5      | <5      | 0 | 100 | -251.97 | -0.2689 | +DMSO |  | < | 5      | <5       | 0 | 100 | -221.95 | -0.6601 | +LIMK |  |
| GW683109X  | BDP-00006476 | < | 5      | <5      | 0 | 100 | -0.5718 | 0.1336  | +DMSO |  | < | 5      | <5       | 0 | 100 | -0.6634 | 0.2059  | +LIMK |  |
| GW683768X  | BDP-00006477 | > | 8.3372 | >8.3372 | 0 | 100 | -10.274 | -0.3912 | +DMSO |  | < | 5      | <5       | 0 | 100 | -0.6579 | 0.1293  | +LIMK |  |

|           |              |   |   |    |   |     |         |         |       |                                                                                     |   |        |          |   |     |         |         |       |                                                                                       |
|-----------|--------------|---|---|----|---|-----|---------|---------|-------|-------------------------------------------------------------------------------------|---|--------|----------|---|-----|---------|---------|-------|---------------------------------------------------------------------------------------|
| GW708336X | BDP-00006478 | < | 5 | <5 | 0 | 100 | -1.2415 | 0.0896  | +DMSO | 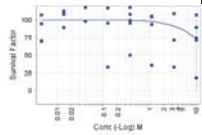   | < | 5      | <5       | 0 | 100 | -12.665 | 0.4428  | +LIMK |    |
| GW778894X | BDP-00006479 | < | 5 | <5 | 0 | 100 | 26.727  | -0.4195 | +DMSO |    | < | 5      | <5       | 0 | 100 | 4.5669  | -2.8858 | +LIMK |    |
| GW779439X | BDP-00006480 | < | 5 | <5 | 0 | 100 | 380.98  | -49.555 | +DMSO |   | < | 5      | <5       | 0 | 100 | 4.798   | -7.3225 | +LIMK |   |
| GW780056X | BDP-00006481 | < | 5 | <5 | 0 | 100 | 4.3988  | -12.488 | +DMSO |  | < | 5      | <5       | 0 | 100 | 56.696  | -7.8628 | +LIMK |  |
| GW781673X | BDP-00006482 | < | 5 | <5 | 0 | 100 | -1.0329 | 0.303   | +DMSO |  | = | 5.2858 | 5.178924 | 0 | 100 | -1.6344 | 0.7171  | +LIMK |  |
| GI261520A | BDP-00006484 | < | 5 | <5 | 0 | 100 | -0.5599 | 0.1572  | +DMSO |  | < | 5      | <5       | 0 | 100 | -0.7486 | 0.5487  | +LIMK |  |

|             |              |   |        |         |   |     |         |         |       |                                                                                     |   |        |          |   |     |         |         |       |                                                                                       |
|-------------|--------------|---|--------|---------|---|-----|---------|---------|-------|-------------------------------------------------------------------------------------|---|--------|----------|---|-----|---------|---------|-------|---------------------------------------------------------------------------------------|
| GW305074X   | BDP-00006486 | < | 5      | <5      | 0 | 100 | -227.75 | -1.3898 | +DMSO | 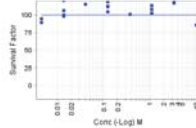   | < | 5      | <5       | 0 | 100 | -9.7162 | -0.5103 | +LIMK |    |
| GW405841X   | BDP-00006487 | < | 5      | <5      | 0 | 100 | -259.08 | -0.4558 | +DMSO |    | < | 5      | <5       | 0 | 100 | -445.53 | -0.6029 | +LIMK |    |
| GW407323A   | BDP-00006489 | < | 5      | <5      | 0 | 100 | -26.783 | -1.3003 | +DMSO |    | < | 5      | <5       | 0 | 100 | -234.57 | -0.0395 | +LIMK |    |
| GW429374A   | BDP-00006490 | > | 8.3372 | >8.3372 | 0 | 100 | 4.016   | -2.1815 | +DMSO |   | < | 5      | <5       | 0 | 100 | -13.7   | -1.5741 | +LIMK |   |
| SB-476429-A | BDP-00006493 | < | 5      | <5      | 0 | 100 | -10.611 | -0.5689 | +DMSO |  | < | 5      | <5       | 0 | 100 | -57.932 | -1.2999 | +LIMK |  |
| SB-610251-B | BDP-00006494 | < | 5      | <5      | 0 | 100 | -18.801 | -0.6817 | +DMSO |  | = | 5.0116 | 9.736795 | 0 | 100 | -17.693 | 0.4844  | +LIMK |  |

|             |              |   |        |         |   |     |         |         |       |                                                                                     |   |        |          |   |     |         |         |       |                                                                                       |
|-------------|--------------|---|--------|---------|---|-----|---------|---------|-------|-------------------------------------------------------------------------------------|---|--------|----------|---|-----|---------|---------|-------|---------------------------------------------------------------------------------------|
| SB-614067-R | BDP-00006496 | > | 8.3372 | >8.3372 | 0 | 100 | 2.8751  | -0.0063 | +DMSO | 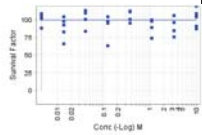   | < | 5      | <5       | 0 | 100 | -561.01 | -0.1695 | +LIMK |    |
| GW434756X   | BDP-00006498 | < | 5      | <5      | 0 | 100 | -14.003 | -1.4217 | +DMSO |    | < | 5      | <5       | 0 | 100 | -3.7542 | -0.0132 | +LIMK |    |
| GSK182497A  | BDP-00006499 | < | 5      | <5      | 0 | 100 | -100.1  | -0.2625 | +DMSO |   | < | 5      | <5       | 0 | 100 | -296.93 | -0.1939 | +LIMK |   |
| GSK192082A  | BDP-00006500 | < | 5      | <5      | 0 | 100 | -1.3583 | 0.4804  | +DMSO |  | = | 5.2557 | 5.550494 | 0 | 100 | -2.2964 | 0.7014  | +LIMK |  |
| GSK300014A  | BDP-00006502 | < | 5      | <5      | 0 | 100 | -29.046 | -0.191  | +DMSO |  | < | 5      | <5       | 0 | 100 | -13.096 | 0.3512  | +LIMK |  |
| GSK969786A  | BDP-00006503 | > | 8.3372 | >8.3372 | 0 | 100 | 4.3614  | -0.1302 | +DMSO |  | < | 5      | <5       | 0 | 100 | -157.6  | -1.6155 | +LIMK |  |

|           |              |   |   |    |   |     |         |         |       |                                                                                   |   |        |          |   |     |         |         |       |                                                                                     |
|-----------|--------------|---|---|----|---|-----|---------|---------|-------|-----------------------------------------------------------------------------------|---|--------|----------|---|-----|---------|---------|-------|-------------------------------------------------------------------------------------|
| GW684626B | BDP-00006504 | < | 5 | <5 | 0 | 100 | -10.943 | -0.1839 | +DMSO | 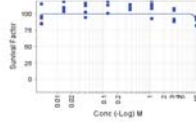 | < | 5      | <5       | 0 | 100 | -11.694 | -0.137  | +LIMK |  |
| GW693881A | BDP-00006505 | < | 5 | <5 | 0 | 100 | -2.0369 | 0.4205  | +DMSO |  | ■ | 5.3225 | 4.758769 | 0 | 100 | -4.4042 | 0.8801  | +LIMK |  |
| GW296115X | BDP-00006507 | < | 5 | <5 | 0 | 100 | -11.438 | -0.9196 | +DMSO |  | < | 5      | <5       | 0 | 100 | -1.9485 | -0.7199 | +LIMK |  |
