# Supplementary material for: LIM kinase inhibitors disrupt mitotic microtubule organization and impair tumor cell proliferation
Source: PubMed Central journal article supplement (PMC4770715; doi:10.18632/oncotarget.6288), 2015-11-03
Supplement: oncotarget-06-38469-s006.pdf [file oncotarget-06-38469-s006.pdf]

**Supplemental Table 5. Physicochemical properties of CRT0105446 and CRT0105950.**

| <b>Property</b>        | <b>CRT0105446</b>                        | <b>CRT0105950</b>                        |
|------------------------|------------------------------------------|------------------------------------------|
| MW                     | 421                                      | 393                                      |
| cLogP                  | 4.3                                      | 4.4                                      |
| LIMK1 IC <sub>50</sub> | 8                                        | 0.3                                      |
| LIMK2 IC <sub>50</sub> | 32                                       | 1                                        |
| Microsome stability    | Mouse 51%<br>Human 34%                   | Mouse 50%<br>Human 9%                    |
| Cytochrome p450        | 3A4, 2D6 1-10 µM<br>2C9, 2C19,1A2 >10 µM | 3A4, 2D6 1-10 µM<br>2C9, 2C19,1A2 >10 µM |
| Mechanism of Action    | ATP-competitive                          | ATP-competitive                          |
