# Supplementary material for: LIM kinase inhibitors disrupt mitotic microtubule organization and impair tumor cell proliferation
Source: PubMed Central journal article supplement (PMC4770715; doi:10.18632/oncotarget.6288), 2015-11-03
Supplement: oncotarget-06-38469-s007.pdf [file oncotarget-06-38469-s007.pdf]

Compound Concentration (µM)

10

**Data shown as Percent Control**

100% = no compound has competed

|                               |        | 50-25%            | 24-0%             |
|-------------------------------|--------|-------------------|-------------------|
|                               |        | CRT0105446 @ 10uM | CRT0105950 @ 10uM |
| AAK1                          | AAK1   | 78                | 51                |
| ABL1(E255K)-phosphorylated    | ABL1   | 78                | 79                |
| ABL1(F317I)-nonphosphorylated | ABL1   | 100               | 93                |
| ABL1(F317I)-phosphorylated    | ABL1   | 76                | 87                |
| ABL1(F317L)-nonphosphorylated | ABL1   | 92                | 86                |
| ABL1(F317L)-phosphorylated    | ABL1   | 89                | 67                |
| ABL1(H396P)-nonphosphorylated | ABL1   | 71                | 27                |
| ABL1(H396P)-phosphorylated    | ABL1   | 82                | 72                |
| ABL1(M351T)-phosphorylated    | ABL1   | 83                | 66                |
| ABL1(Q252H)-nonphosphorylated | ABL1   | 83                | 70                |
| ABL1(Q252H)-phosphorylated    | ABL1   | 81                | 74                |
| ABL1(T315I)-nonphosphorylated | ABL1   | 100               | 82                |
| ABL1(T315I)-phosphorylated    | ABL1   | 99                | 79                |
| ABL1(Y253F)-phosphorylated    | ABL1   | 89                | 74                |
| ABL1-nonphosphorylated        | ABL1   | 82                | 43                |
| ABL1-phosphorylated           | ABL1   | 77                | 70                |
| ABL2                          | ABL2   | 100               | 58                |
| ACVR1                         | ACVR1  | 100               | 52                |
| ACVR1B                        | ACVR1B | 82                | 76                |
| ACVR2A                        | ACVR2A | 74                | 45                |
| ACVR2B                        | ACVR2B | 100               | 32                |
| ACVRL1                        | ACVRL1 | 100               | 100               |
| ADCK3                         | CABC1  | 98                | 56                |
| ADCK4                         | ADCK4  | 85                | 58                |
| AKT1                          | AKT1   | 100               | 100               |
| AKT2                          | AKT2   | 100               | 100               |
| AKT3                          | AKT3   | 100               | 100               |
| ALK                           | ALK    | 89                | 20                |
| AMPK-alpha1                   | PRKAA1 | 1.1               | 2.1               |
| AMPK-alpha2                   | PRKAA2 | 3.9               | 2                 |
| ANKK1                         | ANKK1  | 99                | 69                |
| ARK5                          | NUAK1  | 59                | 49                |
| ASK1                          | MAP3K5 | 100               | 100               |
| ASK2                          | MAP3K6 | 100               | 100               |

Screening Concentration (10 µM)

Number of Non-Mutant Kinases used in the screen 386

| Compound Name | Selectivity Score Type | Number of Hits | Selectivity Score |
|---------------|------------------------|----------------|-------------------|
| CRT0105446    | S(35)                  | 32             | 0.083             |
|               | S(10)                  | 15             | 0.039             |
|               | S(1)                   | 3              | 0.008             |
| CRT0105950    | S(35)                  | 149            | 0.386             |
|               | S(10)                  | 63             | 0.163             |
|               | S(1)                   | 17             | 0.044             |

|               |        |     |      |
|---------------|--------|-----|------|
| AURKA         | AURKA  | 100 | 18   |
| AURKB         | AURKB  | 80  | 0.15 |
| AURKC         | AURKC  | 88  | 3.8  |
| AXL           | AXL    | 87  | 43   |
| BIKE          | BMP2K  | 100 | 36   |
| BLK           | BLK    | 100 | 9.2  |
| BMPR1A        | BMPR1A | 100 | 91   |
| BMPR1B        | BMPR1B | 92  | 29   |
| BMPR2         | BMPR2  | 100 | 8.9  |
| BMX           | BMX    | 100 | 81   |
| BRAF          | BRAF   | 79  | 93   |
| BRAF(V600E)   | BRAF   | 64  | 83   |
| BRK           | PTK6   | 100 | 100  |
| BRSK1         | BRSK1  | 27  | 30   |
| BRSK2         | BRSK2  | 59  | 33   |
| BTK           | BTK    | 85  | 72   |
| CAMK1         | CAMK1  | 62  | 9.4  |
| CAMK1D        | CAMK1D | 79  | 63   |
| CAMK1G        | CAMK1G | 99  | 57   |
| CAMK2A        | CAMK2A | 82  | 33   |
| CAMK2B        | CAMK2B | 92  | 42   |
| CAMK2D        | CAMK2D | 72  | 29   |
| CAMK2G        | CAMK2G | 80  | 49   |
| CAMK4         | CAMK4  | 98  | 90   |
| CAMKK1        | CAMKK1 | 82  | 26   |
| CAMKK2        | CAMKK2 | 95  | 43   |
| CASK          | CASK   | 1.2 | 13   |
| CDC2L1        | CDC2L1 | 54  | 71   |
| CDC2L2        | CDC2L2 | 59  | 89   |
| CDC2L5        | CDC2L5 | 14  | 26   |
| CDK11         | CDC2L6 | 34  | 2.3  |
| CDK2          | CDK2   | 0.9 | 0.2  |
| CDK3          | CDK3   | 24  | 7.7  |
| CDK4-cyclinD1 | CDK4   | 20  | 3.7  |
| CDK4-cyclinD3 | CDK4   | 48  | 13   |
| CDK5          | CDK5   | 60  | 12   |
| CDK7          | CDK7   | 5.8 | 32   |
| CDK8          | CDK8   | 39  | 11   |
| CDK9          | CDK9   | 28  | 65   |

|          |          |     |      |
|----------|----------|-----|------|
| CDKL1    | CDKL1    | 80  | 77   |
| CDKL2    | CDKL2    | 2.2 | 0.6  |
| CDKL3    | CDKL3    | 26  | 23   |
| CDKL5    | CDKL5    | 100 | 99   |
| CHEK1    | CHEK1    | 100 | 88   |
| CHEK2    | CHEK2    | 100 | 55   |
| CIT      | CIT      | 37  | 44   |
| CLK1     | CLK1     | 85  | 0.4  |
| CLK2     | CLK2     | 78  | 0.45 |
| CLK3     | CLK3     | 49  | 22   |
| CLK4     | CLK4     | 100 | 1.6  |
| CSF1R    | CSF1R    | 51  | 1.2  |
| CSK      | CSK      | 91  | 71   |
| CSNK1A1  | CSNK1A1  | 100 | 88   |
| CSNK1A1L | CSNK1A1L | 96  | 74   |
| CSNK1D   | CSNK1D   | 27  | 6.1  |
| CSNK1E   | CSNK1E   | 42  | 11   |
| CSNK1G1  | CSNK1G1  | 94  | 82   |
| CSNK1G2  | CSNK1G2  | 55  | 30   |
| CSNK1G3  | CSNK1G3  | 67  | 43   |
| CSNK2A1  | CSNK2A1  | 95  | 60   |
| CSNK2A2  | CSNK2A2  | 91  | 58   |
| CTK      | MATK     | 100 | 100  |
| DAPK1    | DAPK1    | 100 | 82   |
| DAPK2    | DAPK2    | 87  | 53   |
| DAPK3    | DAPK3    | 83  | 44   |
| DCAMKL1  | DCLK1    | 46  | 75   |
| DCAMKL2  | DCLK2    | 39  | 77   |
| DCAMKL3  | DCLK3    | 88  | 7.4  |
| DDR1     | DDR1     | 83  | 0.1  |
| DDR2     | DDR2     | 0.4 | 12   |
| DLK      | MAP3K12  | 100 | 100  |
| DMPK     | DMPK     | 100 | 100  |
| DMPK2    | CDC42BPG | 93  | 71   |
| DRAK1    | STK17A   | 81  | 100  |
| DRAK2    | STK17B   | 100 | 100  |
| DYRK1A   | DYRK1A   | 76  | 30   |
| DYRK1B   | DYRK1B   | 40  | 5.6  |
| DYRK2    | DYRK2    | 81  | 79   |

|                           |         |     |     |
|---------------------------|---------|-----|-----|
| EGFR                      | EGFR    | 100 | 53  |
| EGFR(E746-A750del)        | EGFR    | 100 | 78  |
| EGFR(G719C)               | EGFR    | 89  | 71  |
| EGFR(G719S)               | EGFR    | 94  | 75  |
| EGFR(L747-E749del, A750P) | EGFR    | 98  | 64  |
| EGFR(L747-S752del, P753S) | EGFR    | 92  | 66  |
| EGFR(L747-T751del,Sins)   | EGFR    | 100 | 68  |
| EGFR(L858R)               | EGFR    | 76  | 69  |
| EGFR(L858R,T790M)         | EGFR    | 91  | 89  |
| EGFR(L861Q)               | EGFR    | 100 | 65  |
| EGFR(S752-I759del)        | EGFR    | 84  | 69  |
| EGFR(T790M)               | EGFR    | 78  | 63  |
| EIF2AK1                   | EIF2AK1 | 100 | 97  |
| EPHA1                     | EPHA1   | 100 | 74  |
| EPHA2                     | EPHA2   | 100 | 70  |
| EPHA3                     | EPHA3   | 87  | 71  |
| EPHA4                     | EPHA4   | 100 | 94  |
| EPHA5                     | EPHA5   | 100 | 100 |
| EPHA6                     | EPHA6   | 86  | 30  |
| EPHA7                     | EPHA7   | 94  | 83  |
| EPHA8                     | EPHA8   | 100 | 88  |
| EPHB1                     | EPHB1   | 88  | 80  |
| EPHB2                     | EPHB2   | 100 | 81  |
| EPHB3                     | EPHB3   | 83  | 96  |
| EPHB4                     | EPHB4   | 93  | 82  |
| EPHB6                     | EPHB6   | 86  | 17  |
| ERBB2                     | ERBB2   | 94  | 80  |
| ERBB3                     | ERBB3   | 100 | 100 |
| ERBB4                     | ERBB4   | 100 | 94  |
| ERK1                      | MAPK3   | 100 | 96  |
| ERK2                      | MAPK1   | 100 | 100 |
| ERK3                      | MAPK6   | 100 | 97  |
| ERK4                      | MAPK4   | 100 | 86  |
| ERK5                      | MAPK7   | 86  | 93  |
| ERK8                      | MAPK15  | 1.4 | 1.6 |
| ERN1                      | ERN1    | 87  | 68  |
| FAK                       | PTK2    | 100 | 33  |
| FER                       | FER     | 100 | 57  |
| FES                       | FES     | 87  | 93  |

|                       |         |     |      |
|-----------------------|---------|-----|------|
| FGFR1                 | FGFR1   | 98  | 5    |
| FGFR2                 | FGFR2   | 100 | 17   |
| FGFR3                 | FGFR3   | 96  | 4.8  |
| FGFR3(G697C)          | FGFR3   | 93  | 7.2  |
| FGFR4                 | FGFR4   | 90  | 29   |
| FGR                   | FGR     | 93  | 32   |
| FLT1                  | FLT1    | 80  | 21   |
| FLT3                  | FLT3    | 41  | 0.55 |
| FLT3(D835H)           | FLT3    | 15  | 0.95 |
| FLT3(D835Y)           | FLT3    | 20  | 1.2  |
| FLT3(ITD)             | FLT3    | 79  | 4.4  |
| FLT3(K663Q)           | FLT3    | 34  | 0.5  |
| FLT3(N841I)           | FLT3    | 22  | 0    |
| FLT3(R834Q)           | FLT3    | 88  | 18   |
| FLT4                  | FLT4    | 61  | 26   |
| FRK                   | FRK     | 98  | 59   |
| FYN                   | FYN     | 99  | 49   |
| GAK                   | GAK     | 92  | 22   |
| GCN2(Kin.Dom.2,S808G) | EIF2AK4 | 92  | 94   |
| GRK1                  | GRK1    | 70  | 59   |
| GRK4                  | GRK4    | 100 | 89   |
| GRK7                  | GRK7    | 58  | 16   |
| GSK3A                 | GSK3A   | 56  | 32   |
| GSK3B                 | GSK3B   | 82  | 86   |
| HCK                   | HCK     | 100 | 94   |
| HIPK1                 | HIPK1   | 100 | 65   |
| HIPK2                 | HIPK2   | 92  | 55   |
| HIPK3                 | HIPK3   | 98  | 69   |
| HIPK4                 | HIPK4   | 75  | 16   |
| HPK1                  | MAP4K1  | 100 | 22   |
| HUNK                  | HUNK    | 89  | 49   |
| ICK                   | ICK     | 18  | 19   |
| IGF1R                 | IGF1R   | 100 | 3.6  |
| IKK-alpha             | CHUK    | 89  | 94   |
| IKK-beta              | IKKB    | 88  | 88   |
| IKK-epsilon           | IKBKE   | 85  | 41   |
| INSR                  | INSR    | 100 | 1    |
| INSRR                 | INSRR   | 96  | 0.15 |
| IRAK1                 | IRAK1   | 94  | 56   |

|                              |         |     |      |
|------------------------------|---------|-----|------|
| IRAK3                        | IRAK3   | 89  | 8.1  |
| IRAK4                        | IRAK4   | 100 | 80   |
| ITK                          | ITK     | 100 | 61   |
| JAK1(JH1domain-catalytic)    | JAK1    | 89  | 53   |
| JAK1(JH2domain-pseudokinase) | JAK1    | 92  | 74   |
| JAK2(JH1domain-catalytic)    | JAK2    | 100 | 19   |
| JAK3(JH1domain-catalytic)    | JAK3    | 100 | 33   |
| JNK1                         | MAPK8   | 34  | 40   |
| JNK2                         | MAPK9   | 50  | 30   |
| JNK3                         | MAPK10  | 36  | 25   |
| KIT                          | KIT     | 55  | 3.2  |
| KIT(A829P)                   | KIT     | 100 | 35   |
| KIT(D816H)                   | KIT     | 89  | 46   |
| KIT(D816V)                   | KIT     | 83  | 2.8  |
| KIT(L576P)                   | KIT     | 36  | 0.4  |
| KIT(V559D)                   | KIT     | 39  | 0.75 |
| KIT(V559D,T670I)             | KIT     | 74  | 36   |
| KIT(V559D,V654A)             | KIT     | 100 | 11   |
| LATS1                        | LATS1   | 91  | 23   |
| LATS2                        | LATS2   | 90  | 6    |
| LCK                          | LCK     | 100 | 20   |
| LIMK1                        | LIMK1   | 2   | 0.9  |
| LIMK2                        | LIMK2   | 1.1 | 0    |
| LKB1                         | STK11   | 100 | 79   |
| LOK                          | STK10   | 100 | 51   |
| LRRK2                        | LRRK2   | 91  | 54   |
| LRRK2(G2019S)                | LRRK2   | 86  | 56   |
| LTK                          | LTK     | 100 | 100  |
| LYN                          | LYN     | 100 | 26   |
| LZK                          | MAP3K13 | 100 | 96   |
| MAK                          | MAK     | 0.6 | 2    |
| MAP3K1                       | MAP3K1  | 88  | 71   |
| MAP3K15                      | MAP3K15 | 93  | 82   |
| MAP3K2                       | MAP3K2  | 82  | 15   |
| MAP3K3                       | MAP3K3  | 100 | 20   |
| MAP3K4                       | MAP3K4  | 99  | 100  |
| MAP4K2                       | MAP4K2  | 100 | 81   |
| MAP4K3                       | MAP4K3  | 58  | 18   |
| MAP4K4                       | MAP4K4  | 68  | 11   |

|             |          |     |      |
|-------------|----------|-----|------|
| MAP4K5      | MAP4K5   | 100 | 32   |
| MAPKAPK2    | MAPKAPK2 | 100 | 100  |
| MAPKAPK5    | MAPKAPK5 | 95  | 97   |
| MARK1       | MARK1    | 87  | 5.8  |
| MARK2       | MARK2    | 63  | 28   |
| MARK3       | MARK3    | 78  | 51   |
| MARK4       | MARK4    | 57  | 4    |
| MAST1       | MAST1    | 68  | 84   |
| MEK1        | MAP2K1   | 87  | 51   |
| MEK2        | MAP2K2   | 92  | 42   |
| MEK3        | MAP2K3   | 83  | 27   |
| MEK4        | MAP2K4   | 82  | 1.8  |
| MEK5        | MAP2K5   | 100 | 60   |
| MEK6        | MAP2K6   | 100 | 20   |
| MELK        | MELK     | 100 | 11   |
| MERTK       | MERTK    | 69  | 0.45 |
| MET         | MET      | 80  | 16   |
| MET(M1250T) | MET      | 93  | 19   |
| MET(Y1235D) | MET      | 96  | 14   |
| MINK        | MINK1    | 100 | 13   |
| MKK7        | MAP2K7   | 97  | 38   |
| MKMK1       | MKMK1    | 49  | 46   |
| MKMK2       | MKMK2    | 68  | 1.8  |
| MLCK        | MYLK3    | 90  | 14   |
| MLK1        | MAP3K9   | 86  | 13   |
| MLK2        | MAP3K10  | 69  | 40   |
| MLK3        | MAP3K11  | 100 | 43   |
| MRCKA       | CDC42BPA | 77  | 84   |
| MRCKB       | CDC42BPB | 93  | 78   |
| MST1        | STK4     | 100 | 3.4  |
| MST1R       | MST1R    | 100 | 92   |
| MST2        | STK3     | 100 | 0.7  |
| MST3        | STK24    | 72  | 40   |
| MST4        | MST4     | 61  | 37   |
| MTOR        | FRAP1    | 64  | 35   |
| MUSK        | MUSK     | 96  | 18   |
| MYLK        | MYLK     | 100 | 28   |
| MYLK2       | MYLK2    | 49  | 49   |
| MYLK4       | MYLK4    | 71  | 9.4  |

|                       |             |     |     |
|-----------------------|-------------|-----|-----|
| MYO3A                 | MYO3A       | 100 | 65  |
| MYO3B                 | MYO3B       | 100 | 90  |
| NDR1                  | STK38       | 100 | 86  |
| NDR2                  | STK38L      | 82  | 80  |
| NEK1                  | NEK1        | 100 | 81  |
| NEK11                 | NEK11       | 100 | 84  |
| NEK2                  | NEK2        | 100 | 82  |
| NEK3                  | NEK3        | 100 | 88  |
| NEK4                  | NEK4        | 91  | 77  |
| NEK5                  | NEK5        | 99  | 65  |
| NEK6                  | NEK6        | 95  | 100 |
| NEK7                  | NEK7        | 100 | 100 |
| NEK9                  | NEK9        | 92  | 96  |
| NIM1                  | MGC42105    | 100 | 100 |
| NLK                   | NLK         | 57  | 20  |
| OSR1                  | OSR1        | 100 | 84  |
| p38-alpha             | MAPK14      | 93  | 87  |
| p38-beta              | MAPK11      | 100 | 93  |
| p38-delta             | MAPK13      | 97  | 100 |
| p38-gamma             | MAPK12      | 100 | 100 |
| PAK1                  | PAK1        | 57  | 97  |
| PAK2                  | PAK2        | 80  | 76  |
| PAK3                  | PAK3        | 4.6 | 4.1 |
| PAK4                  | PAK4        | 82  | 79  |
| PAK6                  | PAK6        | 93  | 38  |
| PAK7                  | PAK7        | 95  | 93  |
| PCK1                  | PCK1        | 11  | 63  |
| PCK2                  | PCK2        | 17  | 52  |
| PCK3                  | PCK3        | 7.7 | 68  |
| PDGFRA                | PDGFRA      | 66  | 48  |
| PDGFRB                | PDGFRB      | 51  | 1.6 |
| PDPK1                 | PDPK1       | 100 | 28  |
| PFCDPK1(P.falciparum) | PFB0815w    | 30  | 17  |
| PFPK5(P.falciparum)   | MAL13P1.279 | 100 | 84  |
| PFTAIRE2              | PFTK2       | 18  | 18  |
| PFTK1                 | PFTK1       | 51  | 47  |
| PHKG1                 | PHKG1       | 78  | 56  |
| PHKG2                 | PHKG2       | 92  | 52  |
| PIK3C2B               | PIK3C2B     | 100 | 100 |

|                      |         |     |     |
|----------------------|---------|-----|-----|
| PIK3C2G              | PIK3C2G | 100 | 95  |
| PIK3CA               | PIK3CA  | 100 | 100 |
| PIK3CA(C420R)        | PIK3CA  | 100 | 88  |
| PIK3CA(E542K)        | PIK3CA  | 100 | 100 |
| PIK3CA(E545A)        | PIK3CA  | 100 | 100 |
| PIK3CA(E545K)        | PIK3CA  | 97  | 100 |
| PIK3CA(H1047L)       | PIK3CA  | 100 | 97  |
| PIK3CA(H1047Y)       | PIK3CA  | 94  | 93  |
| PIK3CA(I800L)        | PIK3CA  | 100 | 100 |
| PIK3CA(M1043I)       | PIK3CA  | 100 | 100 |
| PIK3CA(Q546K)        | PIK3CA  | 100 | 100 |
| PIK3CB               | PIK3CB  | 95  | 80  |
| PIK3CD               | PIK3CD  | 100 | 100 |
| PIK3CG               | PIK3CG  | 96  | 82  |
| PIK4CB               | PI4KB   | 80  | 2.9 |
| PIM1                 | PIM1    | 96  | 76  |
| PIM2                 | PIM2    | 100 | 100 |
| PIM3                 | PIM3    | 95  | 72  |
| PIP5K1A              | PIP5K1A | 100 | 82  |
| PIP5K1C              | PIP5K1C | 60  | 100 |
| PIP5K2B              | PIP4K2B | 100 | 44  |
| PIP5K2C              | PIP4K2C | 3   | 2.3 |
| PKAC-alpha           | PRKACA  | 100 | 41  |
| PKAC-beta            | PRKACB  | 100 | 44  |
| PKMYT1               | PKMYT1  | 100 | 100 |
| PKN1                 | PKN1    | 62  | 20  |
| PKN2                 | PKN2    | 96  | 26  |
| PKNB(M.tuberculosis) | pknB    | 82  | 19  |
| PLK1                 | PLK1    | 100 | 100 |
| PLK2                 | PLK2    | 99  | 9   |
| PLK3                 | PLK3    | 97  | 44  |
| PLK4                 | PLK4    | 89  | 43  |
| PRKCD                | PRKCD   | 90  | 76  |
| PRKCE                | PRKCE   | 72  | 55  |
| PRKCH                | PRKCH   | 100 | 49  |
| PRKCI                | PRKCI   | 81  | 79  |
| PRKCQ                | PRKCQ   | 74  | 13  |
| PRKD1                | PRKD1   | 88  | 18  |
| PRKD2                | PRKD2   | 74  | 26  |

|                               |          |     |      |
|-------------------------------|----------|-----|------|
| PRKD3                         | PRKD3    | 98  | 11   |
| PRKG1                         | PRKG1    | 100 | 72   |
| PRKG2                         | PRKG2    | 100 | 73   |
| PRKR                          | EIF2AK2  | 81  | 53   |
| PRKX                          | PRKX     | 100 | 100  |
| PRP4                          | PRPF4B   | 100 | 100  |
| PYK2                          | PTK2B    | 100 | 2.2  |
| QSK                           | KIAA0999 | 100 | 72   |
| RAF1                          | RAF1     | 100 | 85   |
| RET                           | RET      | 87  | 1.2  |
| RET(M918T)                    | RET      | 91  | 0.35 |
| RET(V804L)                    | RET      | 99  | 5.8  |
| RET(V804M)                    | RET      | 68  | 3.4  |
| RIOK1                         | RIOK1    | 97  | 65   |
| RIOK2                         | RIOK2    | 16  | 2    |
| RIOK3                         | RIOK3    | 94  | 66   |
| RIPK1                         | RIPK1    | 90  | 17   |
| RIPK2                         | RIPK2    | 80  | 18   |
| RIPK4                         | RIPK4    | 100 | 99   |
| RIPK5                         | DSTKY    | 86  | 45   |
| ROCK1                         | ROCK1    | 86  | 79   |
| ROCK2                         | ROCK2    | 95  | 77   |
| ROS1                          | ROS1     | 100 | 100  |
| RPS6KA4(Kin.Dom.1-N-terminal) | RPS6KA4  | 100 | 14   |
| RPS6KA4(Kin.Dom.2-C-terminal) | RPS6KA4  | 57  | 72   |
| RPS6KA5(Kin.Dom.1-N-terminal) | RPS6KA5  | 89  | 50   |
| RPS6KA5(Kin.Dom.2-C-terminal) | RPS6KA5  | 86  | 89   |
| RSK1(Kin.Dom.1-N-terminal)    | RPS6KA1  | 56  | 0.05 |
| RSK1(Kin.Dom.2-C-terminal)    | RPS6KA1  | 43  | 27   |
| RSK2(Kin.Dom.1-N-terminal)    | RPS6KA3  | 37  | 0.1  |
| RSK3(Kin.Dom.1-N-terminal)    | RPS6KA2  | 71  | 0.15 |
| RSK3(Kin.Dom.2-C-terminal)    | RPS6KA2  | 93  | 88   |
| RSK4(Kin.Dom.1-N-terminal)    | RPS6KA6  | 59  | 0.4  |
| RSK4(Kin.Dom.2-C-terminal)    | RPS6KA6  | 16  | 2.9  |
| S6K1                          | RPS6KB1  | 78  | 41   |
| SBK1                          | SBK1     | 100 | 79   |
| SgK110                        | SgK110   | 100 | 25   |
| SGK3                          | SGK3     | 95  | 72   |
| SIK                           | SIK1     | 84  | 6.4  |

|        |        |     |     |
|--------|--------|-----|-----|
| SIK2   | SIK2   | 78  | 7.1 |
| SLK    | SLK    | 100 | 95  |
| SNARK  | NUAK2  | 84  | 31  |
| SNRK   | SNRK   | 81  | 100 |
| SRC    | SRC    | 100 | 82  |
| SRMS   | SRMS   | 93  | 87  |
| SRPK1  | SRPK1  | 100 | 74  |
| SRPK2  | SRPK2  | 93  | 83  |
| SRPK3  | SRPK3  | 93  | 62  |
| STK16  | STK16  | 5   | 8.7 |
| STK33  | STK33  | 100 | 100 |
| STK35  | STK35  | 98  | 100 |
| STK36  | STK36  | 57  | 17  |
| STK39  | STK39  | 100 | 100 |
| SYK    | SYK    | 100 | 100 |
| TAK1   | MAP3K7 | 79  | 33  |
| TAOK1  | TAOK1  | 93  | 17  |
| TAOK2  | TAOK2  | 76  | 21  |
| TAOK3  | TAOK3  | 96  | 28  |
| TBK1   | TBK1   | 82  | 52  |
| TEC    | TEC    | 100 | 100 |
| TESK1  | TESK1  | 96  | 20  |
| TGFBR1 | TGFBR1 | 99  | 74  |
| TGFBR2 | TGFBR2 | 94  | 18  |
| TIE1   | TIE1   | 87  | 16  |
| TIE2   | TEK    | 87  | 44  |
| TLK1   | TLK1   | 100 | 62  |
| TLK2   | TLK2   | 99  | 56  |
| TNIK   | TNIK   | 89  | 10  |
| TNK1   | TNK1   | 67  | 3.7 |
| TNK2   | TNK2   | 91  | 25  |
| TNNI3K | TNNI3K | 93  | 43  |
| TRKA   | NTRK1  | 70  | 1   |
| TRKB   | NTRK2  | 99  | 6.4 |
| TRKC   | NTRK3  | 100 | 0.6 |
| TRPM6  | TRPM6  | 94  | 93  |
| TSSK1B | TSSK1B | 80  | 100 |
| TTK    | TTK    | 32  | 1.7 |
| TXK    | TXK    | 100 | 38  |

|                              |        |     |     |
|------------------------------|--------|-----|-----|
| TYK2(JH1domain-catalytic)    | TYK2   | 72  | 25  |
| TYK2(JH2domain-pseudokinase) | TYK2   | 100 | 81  |
| TYRO3                        | TYRO3  | 100 | 51  |
| ULK1                         | ULK1   | 100 | 38  |
| ULK2                         | ULK2   | 100 | 20  |
| ULK3                         | ULK3   | 100 | 68  |
| VEGFR2                       | KDR    | 73  | 45  |
| VRK2                         | VRK2   | 95  | 72  |
| WEE1                         | WEE1   | 87  | 48  |
| WEE2                         | WEE2   | 100 | 100 |
| YANK1                        | STK32A | 69  | 88  |
| YANK2                        | STK32B | 100 | 100 |
| YANK3                        | STK32C | 100 | 100 |
| YES                          | YES1   | 99  | 66  |
| YSK1                         | STK25  | 100 | 22  |
| YSK4                         | YSK4   | 90  | 53  |
| ZAK                          | ZAK    | 100 | 9   |
| ZAP70                        | ZAP70  | 86  | 99  |
