# Supplementary material for: LIM kinase inhibitors disrupt mitotic microtubule organization and impair tumor cell proliferation
Source: PubMed Central journal article supplement (PMC4770715; doi:10.18632/oncotarget.6288), 2015-11-03
Supplement: oncotarget-06-38469-s008.pdf [file oncotarget-06-38469-s008.pdf]

|          |                        |                  |                  |          |          |          |          |          |          |          |          |        |          |          |          |          |
|----------|------------------------|------------------|------------------|----------|----------|----------|----------|----------|----------|----------|----------|--------|----------|----------|----------|----------|
| NI13     | 949177 autonomic_angle | neuroblastoma    | neuroblastoma    | 0.844345 | 0.984099 | 0.143642 | 2.803326 | 4.451463 | 5.469396 | 6.950209 | 7.984395 | 0.022  | 100.9394 | 2.238337 | 4.451463 | 7.897911 |
| NI14     | 949178 autonomic_angle | neuroblastoma    | neuroblastoma    | 0.85191  | 0.851355 | 0.093086 | 0.862113 | 2.51905  | 3.786315 | 5.384218 | 0.856776 | 0.0419 | 103.9911 | 1.687274 | 4.51505  | 5.10883  |
| NI1      | 949179 autonomic_angle | neuroblastoma    | neuroblastoma    | 0.796688 | 0.581901 | 0.07992  | 1.237014 | 4.017678 | 6.162492 | 8.65161  | 0.805684 | 0.0054 | 131.1712 | 2.29516  | 4.017678 | 6.320867 |
| NI-1     | 971773 soft_tissue     | rhabdomyosarcoma | rhabdomyosarcoma | 0.834025 | 0.869929 | 0.155295 | 2.020363 | 3.888221 | 4.964869 | 6.553918 | 0.842697 | 0.004  | 100.9329 | 2.36987  | 3.888221 | 6.505426 |
| NI-3a    | 971774 soft_tissue     | rhabdomyosarcoma | rhabdomyosarcoma | 0.831489 | 0.872289 | 0.139388 | 3.244339 | 5.038605 | 6.712864 | 8.10117  | 0.848355 | 0.008  | 100.9310 | 2.477899 | 5.038605 | 9.028235 |
| NI2-VILL | 971777 skin            | melanoma         | melanoma         | 0.862428 | 0.972349 | 0.100793 | 1.888371 | 5.225939 | 4.692624 | 6.126298 | 0.922249 | 0.0093 | 100.9392 | 2.491052 | 5.225939 | 4.938839 |
