# Supplementary material for: LIM kinase inhibitors disrupt mitotic microtubule organization and impair tumor cell proliferation
Source: PubMed Central journal article supplement (PMC4770715; doi:10.18632/oncotarget.6288), 2015-11-03
Supplement: oncotarget-06-38469-s009.pdf [file oncotarget-06-38469-s009.pdf]

|         |                                         |                            |                   |                    |          |          |          |           |          |          |          |          |          |          |          |          |          |          |         |
|---------|-----------------------------------------|----------------------------|-------------------|--------------------|----------|----------|----------|-----------|----------|----------|----------|----------|----------|----------|----------|----------|----------|----------|---------|
| SNU-449 | 907378 liver                            | carcinoma                  | digestive_system  | liver              | 0.805041 | 0.527454 | 0.062931 | 1.324797  | 3.92054  | 6.428319 | 9.324657 | 0.888099 | 0.0031   | 110.1844 | 2.061134 | 3.92054  | 6.405821 |          |         |
| SNU-C28 | 907240 large_intestine                  | carcinoma                  | digestive_system  | large_intestine    | 0.772176 | 0.613717 | 0.101093 | -0.466837 | 1.47745  | 3.489783 | 5.17124  | 0.767501 | 0.0046   | 126.101  | 1.00029  | 1.47745  | 3.92054  |          |         |
| SNU-C18 | 907243 hematoepithelial_lymphoid_tissue | lymphoid_neoplasm          | lymphoid_neoplasm | lymphoid_tissue    | 0.884609 | 1.126399 | 0.088134 | 2.436228  | 4.830966 | 6.105439 | 6.505488 | 0.861852 | 0.0085   | 9.43235  | 2.462    | 4.830966 | 10.2873  |          |         |
| SNU-C17 | 907244 adrenal_gland                    | adrenal_cortical_carcinoma | kidney            | adrenal_gland      | 0.846606 | 0.846606 | 0.068364 | 0.153385  | 3.699694 | 5.466079 | 0.797658 | 0.0014   | 1.847137 | 1.847137 | 1.847137 | 1.847137 |          |          |         |
| SNU-108 | 907245 central_nervous_system           | glioma                     | nervous_system    | glioma             | 0.845634 | 0.679734 | 0.068364 | 0.069156  | 1.848277 | 3.699694 | 5.466079 | 0.802391 | 0.0018   | 1.848277 | 1.848277 | 1.848277 | 1.848277 |          |         |
| SNU-117 | 907246 large_intestine                  | carcinoma                  | digestive_system  | large_intestine    | 0.828055 | 0.744055 | 0.073033 | 3.307956  | 4.64948  | 6.307956 | 4.64948  | 0.803788 | 0.0022   | 2.627462 | 2.627462 | 3.307956 | 6.307956 |          |         |
| SNU-143 | 907248 large_intestine                  | carcinoma                  | digestive_system  | large_intestine    | 0.858481 | 0.930151 | 0.079027 | 4.49488   | 6.232695 | 7.411358 | 6.804392 | 0.803788 | 0.0012   | 9.380837 | 3.308837 | 6.232695 | 10.52106 |          |         |
| SNU-173 | 907250 central_nervous_system           | glioma                     | nervous_system    | glioma             | 0.857416 | 0.738443 | 0.104889 | -0.375854 | 4.49488  | 6.232695 | 7.411358 | 0.803788 | 0.0018   | 1.879988 | 1.879988 | 1.879988 | 1.879988 |          |         |
| SNU-178 | 907252 large_intestine                  | carcinoma                  | digestive_system  | large_intestine    | 0.857416 | 0.738443 | 0.104889 | -0.375854 | 4.49488  | 6.232695 | 7.411358 | 0.803788 | 0.0018   | 1.879988 | 1.879988 | 1.879988 | 1.879988 |          |         |
| SNU-48  | 907253 ovary                            | carcinoma                  | digestive_system  | ovary              | 0.93534  | 1.088367 | 0.11471  | 0.289729  | 5.5911   | 8.265133 | 0.827028 | 0.0057   | 10.9573  | 10.9573  | 10.9573  | 10.9573  | 10.9573  |          |         |
| SNU-64  | 907254 soft_tissue                      | carcinoma                  | soft_tissue       | soft_tissue        | 0.845834 | 1.00818  | 0.100133 | 4.28605   | 5.98201  | 8.37024  | 0.989055 | 0.0057   | 10.1348  | 10.1348  | 10.1348  | 10.1348  | 10.1348  |          |         |
| SNU-84  | 907255 soft_tissue                      | carcinoma                  | soft_tissue       | soft_tissue        | 0.888715 | 0.940237 | 0.134328 | 16.19349  | 3.533107 | 6.85557  | 0.934967 | 0.0032   | 3.533107 | 3.533107 | 3.533107 | 3.533107 | 3.533107 |          |         |
| SNU-87  | 907256 soft_tissue                      | carcinoma                  | soft_tissue       | soft_tissue        | 0.862764 | 0.862764 | 0.096613 | -0.714288 | 1.180331 | 1.180331 | 1.180331 | 0.471428 | 0.0017   | 1.180331 | 1.180331 | 1.180331 | 1.180331 |          |         |
| SNU-94  | 907258 ovary                            | carcinoma                  | digestive_system  | ovary              | 0.917465 | 0.917465 | 0.060657 | 3.880633  | 5.388235 | 6.449452 | 5.388235 | 0.803788 | 0.0059   | 6.449452 | 6.449452 | 6.449452 | 6.449452 |          |         |
| SNU-96  | 907258 ovary                            | carcinoma                  | digestive_system  | ovary              | 0.84166  | 0.727655 | 0.060657 | 0.495077  | 2.984562 | 4.564452 | 6.449452 | 0.871971 | 0.0059   | 9.999291 | 3.623462 | 3.623462 | 3.623462 |          |         |
| SNU-98  | 907259 large_intestine                  | carcinoma                  | digestive_system  | large_intestine    | 0.84166  | 0.727655 | 0.060657 | 0.495077  | 2.984562 | 4.564452 | 6.449452 | 0.871971 | 0.0059   | 9.999291 | 3.623462 | 3.623462 | 3.623462 |          |         |
| SNU-82  | 907261 large_intestine                  | synovial_carcinoma         | carcinoma         | synovial_carcinoma | 0.847773 | 0.847773 | 0.081015 | -1.018011 | 0.910179 | 3.292174 | 5.374925 | 0.803788 | 0.0085   | 10.91211 | 0.01747  | 0.910179 | 10.91211 |          |         |
| SNU-84  | 907261 large_intestine                  | carcinoma                  | digestive_system  | large_intestine    | 0.850719 | 0.939514 | 0.080105 | 3.887942  | 5.629439 | 6.860327 | 6.860327 | 0.803788 | 0.0085   | 10.91211 | 3.645488 | 5.629439 | 10.91211 |          |         |
| SNU-178 | 907262 stomach                          | carcinoma                  | digestive_system  | stomach            | 0.830107 | 0.790177 | 0.110733 | 2.617388  | 4.534434 | 6.568014 | 0.955174 | 0.0061   | 10.95734 | 2.927262 | 4.534434 | 7.878292 | 6.568014 | 10.95734 |         |
| SNU-178 | 907262 stomach                          | carcinoma                  | digestive_system  | stomach            | 0.840206 | 1.01028  | 0.092930 | 3.744255  | 5.404777 | 6.40382  | 7.824729 | 0.86875  | 0.0042   | 13.6467  | 3.80981  | 5.404777 | 9.28219  | 6.40382  | 13.6467 |
| SNU-178 | 907262 stomach                          | carcinoma                  | digestive_system  | stomach            | 0.840206 | 1.01028  | 0.092930 | 3.744255  | 5.404777 | 6.40382  | 7.824729 | 0.86875  | 0.0042   | 13.6467  | 3.80981  | 5.404777 | 9.28219  | 6.40382  | 13.6467 |
| SNU-178 | 907262 stomach                          | carcinoma                  | digestive_system  | stomach            | 0.840206 | 1.01028  | 0.092930 | 3.744255  | 5.404777 | 6.40382  | 7.824729 | 0.86875  | 0.0042   | 13.6467  | 3.80981  | 5.404777 | 9.28219  | 6.40382  | 13.6467 |
| SNU-178 | 907262 stomach                          | carcinoma                  | digestive_system  | stomach            | 0.840206 | 1.01028  | 0.092930 | 3.744255  | 5.404777 | 6.40382  | 7.824729 | 0.86875  | 0.0042   | 13.6467  | 3.80981  | 5.404777 | 9.28219  | 6.40382  | 13.6467 |
| SNU-178 | 907262 stomach                          | carcinoma                  | digestive_system  | stomach            | 0.840206 | 1.01028  | 0.092930 | 3.744255  | 5.404777 | 6.40382  | 7.824729 | 0.86875  | 0.0042   | 13.6467  | 3.80981  | 5.404777 | 9.28219  | 6.40382  | 13.6467 |
| SNU-178 | 907262 stomach                          | carcinoma                  | digestive_system  | stomach            | 0.840206 | 1.01028  | 0.092930 | 3.744255  | 5.404777 | 6.40382  | 7.824729 | 0.86875  | 0.0042   | 13.6467  | 3.80981  | 5.404777 | 9.28219  | 6.40382  | 13.6467 |
| SNU-178 | 907262 stomach                          | carcinoma                  | digestive_system  | stomach            | 0.840206 | 1.01028  | 0.092930 | 3.744255  | 5.404777 | 6.40382  | 7.824729 | 0.86875  | 0.0042   | 13.6467  | 3.80981  | 5.404777 | 9.28219  | 6.40382  | 13.6467 |
| SNU-178 | 907262 stomach                          | carcinoma                  | digestive_system  | stomach            | 0.840206 | 1.01028  | 0.092930 | 3.744255  | 5.404777 | 6.40382  | 7.824729 | 0.86875  | 0.0042   | 13.6467  | 3.80981  | 5.404777 | 9.28219  | 6.40382  | 13.6467 |
| SNU-178 | 907262 stomach                          | carcinoma                  | digestive_system  | stomach            | 0.840206 | 1.01028  | 0.092930 | 3.744255  | 5.404777 | 6.40382  | 7.824729 | 0.86875  | 0.0042   | 13.6467  | 3.80981  | 5.404777 | 9.28219  | 6.40382  | 13.6467 |
| SNU-178 | 907262 stomach                          | carcinoma                  | digestive_system  | stomach            | 0.840206 | 1.01028  | 0.092930 | 3.744255  | 5.404777 | 6.40382  | 7.824729 | 0.86875  | 0.0042   | 13.6467  | 3.80981  | 5.404777 | 9.28219  | 6.40382  | 13.6467 |
| SNU-178 | 907262 stomach                          | carcinoma                  | digestive_system  | stomach            | 0.840206 | 1.01028  | 0.092930 | 3.744255  | 5.404777 | 6.40382  | 7.824729 | 0.86875  | 0.0042   | 13.6467  | 3.80981  | 5.404777 | 9.28219  | 6.40382  | 13.6467 |
| SNU-178 | 907262 stomach                          | carcinoma                  | digestive_system  | stomach            | 0.840206 | 1.01028  | 0.092930 | 3.744255  | 5.404777 | 6.40382  | 7.824729 | 0.86875  | 0.0042   | 13.6467  | 3.80981  | 5.404777 | 9.28219  | 6.40382  | 13.6467 |
| SNU-178 | 907262 stomach                          | carcinoma                  | digestive_system  | stomach            | 0.840206 | 1.01028  | 0.092930 | 3.744255  | 5.404777 | 6.40382  | 7.824729 | 0.86875  | 0.0042   | 13.6467  | 3.80981  | 5.404777 | 9.28219  | 6.40382  | 13.6467 |
| SNU-178 | 907262 stomach                          | carcinoma                  | digestive_system  | stomach            | 0.840206 | 1.01028  | 0.092930 | 3.744255  | 5.404777 | 6.40382  | 7.824729 | 0.86875  | 0.0042   | 13.6467  | 3.80981  | 5.404777 | 9.28219  | 6.40382  | 13.6467 |
| SNU-178 | 907262 stomach                          | carcinoma                  | digestive_system  | stomach            | 0.840206 | 1.01028  | 0.092930 | 3.744255  | 5.404777 | 6.40382  | 7.824729 | 0.86875  | 0.0042   | 13.6467  | 3.80981  | 5.404777 | 9.28219  | 6.40382  | 13.6467 |
| SNU-178 | 907262 stomach                          | carcinoma                  | digestive_system  | stomach            | 0.840206 | 1.01028  | 0.092930 | 3.744255  | 5.404777 | 6.40382  | 7.824729 | 0.86875  | 0.0042   | 13.6467  | 3.80981  | 5.404777 | 9.28219  | 6.40382  | 13.6467 |
| SNU-178 | 907262 stomach                          | carcinoma                  | digestive_system  | stomach            | 0.840206 | 1.01028  | 0.092930 | 3.744255  | 5.404777 | 6.40382  | 7.824729 | 0.86875  | 0.0042   | 13.6467  | 3.80981  | 5.404777 | 9.28219  | 6.40382  | 13.6467 |
| SNU-178 | 907262 stomach                          | carcinoma                  | digestive_system  | stomach            | 0.840206 | 1.01028  | 0.092930 | 3.744255  | 5.404777 | 6.40382  | 7.824729 | 0.86875  | 0.0042   | 13.6467  | 3.80981  | 5.404777 | 9.28219  | 6.40382  | 13.6467 |
| SNU-178 | 907262 stomach                          | carcinoma                  | digestive_system  | stomach            | 0.840206 | 1.01028  | 0.092930 | 3.744255  | 5.404777 | 6.40382  | 7.824729 | 0.86875  | 0.0042   | 13.6467  | 3.80981  | 5.404777 | 9.28219  | 6.40382  | 13.6467 |
| SNU-178 | 907262 stomach                          | carcinoma                  | digestive_system  | stomach            | 0.840206 | 1.01028  | 0.092930 | 3.744255  | 5.404777 | 6.40382  | 7.824729 | 0.86875  | 0.0042   | 13.6467  | 3.80981  | 5.404777 | 9.28219  | 6.40382  | 13.6467 |
| SNU-178 | 907262 stomach                          | carcinoma                  | digestive_system  | stomach            | 0.840206 | 1.01028  | 0.092930 | 3.744255  | 5.404777 | 6.40382  | 7.824729 | 0.86875  | 0.0042   | 13.6467  | 3.80981  | 5.404777 | 9.28219  | 6.40382  | 13.6467 |
| SNU-178 | 907262 stomach                          | carcinoma                  | digestive_system  | stomach            | 0.840206 | 1.01028  | 0.092930 | 3.744255  | 5.404777 | 6.40382  | 7.824729 | 0.86875  | 0.0042   | 13.6467  | 3.80981  | 5.404777 | 9.28219  | 6.40382  | 13.6467 |
| SNU-178 | 907262 stomach                          | carcinoma                  | digestive_system  | stomach            | 0.840206 | 1.01028  | 0.092930 | 3.744255  | 5.404777 | 6.40382  | 7.824729 | 0.86875  | 0.0042   | 13.6467  | 3.80981  | 5.404777 | 9.28219  | 6.40382  | 13.6467 |
| SNU-178 | 907262 stomach                          | carcinoma                  | digestive_system  | stomach            | 0.840206 | 1.01028  | 0.092930 | 3.744255  | 5.404777 | 6.40382  | 7.824729 | 0.86875  | 0.0042   | 13.6467  | 3.80981  | 5.404777 | 9.28219  | 6.40382  | 13.6467 |
| SNU-178 | 907262 stomach                          | carcinoma                  | digestive_system  | stomach            | 0.840206 | 1.01028  | 0.092930 | 3.744255  | 5.404777 | 6.40382  | 7.824729 | 0.86875  | 0.0042   | 13.6467  | 3.80981  | 5.404777 | 9.28219  | 6.40382  | 13.6467 |
| SNU-178 | 907262 stomach                          | carcinoma                  | digestive_system  | stomach            | 0.840206 | 1.01028  | 0.092930 | 3.744255  | 5.404777 | 6.40382  | 7.824729 | 0.86875  | 0.0042   | 13.6467  | 3.80981  | 5.404777 | 9.28219  | 6.40382  | 13.6467 |
| SNU-178 | 907262 stomach                          | carcinoma                  | digestive_system  | stomach            | 0.840206 | 1.01028  | 0.092930 | 3.744255  | 5.404777 | 6.40382  | 7.824729 | 0.86875  | 0.0042   | 13.6467  | 3.80981  | 5.404777 | 9.28219  | 6.40382  | 13.6467 |
| SNU-178 | 907262 stomach                          | carcinoma                  | digestive_system  | stomach            | 0.840206 | 1.01028  | 0.092930 | 3.744255  | 5.404777 | 6.40382  | 7.824729 | 0.86875  | 0.0042   | 13.6467  | 3.80981  | 5.404777 | 9.28219  | 6.40382  | 13.6467 |
| SNU-178 | 907262 stomach                          | carcinoma                  | digestive_system  | stomach            | 0.840206 | 1.01028  | 0.092930 | 3.744255  | 5.404777 | 6.40382  | 7.824729 | 0.86875  | 0.0042   | 13.6467  | 3.80981  | 5.404777 | 9.28219  | 6.40382  | 13.6467 |
| SNU-178 | 907262 stomach                          | carcinoma                  | digestive_system  | stomach            | 0.840206 | 1.01028  | 0.092930 | 3.744255  | 5.404777 | 6.40382  | 7.824729 | 0.86875  | 0.0042   | 13.6467  | 3.80981  | 5.404777 | 9.28219  | 6.40382  | 13.6467 |
| SNU-178 | 907262 stomach                          | carcinoma                  | digestive_system  | stomach            | 0.840206 | 1.01028  | 0.092930 | 3.744255  | 5.404777 | 6.40382  | 7.824729 | 0.86875  | 0.0042   | 13.6467  | 3.80981  | 5.404777 | 9.28219  | 6.40382  | 13.6467 |
| SNU-178 | 907262 stomach                          | carcinoma                  | digestive_system  | stomach            | 0.840206 | 1.01028  | 0.092930 | 3.744255  | 5.404777 | 6.40382  | 7.824729 | 0.86875  | 0.0042   | 13.6467  | 3.80981  | 5.404777 | 9.28219  | 6.40382  | 13.6467 |
| SNU-178 | 907262 stomach                          | carcinoma                  | digestive_system  | stomach            | 0.840206 | 1.01028  | 0.092930 | 3.744255  | 5.404777 | 6.40382  | 7.824729 | 0.86875  | 0.0042   | 13.6467  | 3.80981  | 5.404777 | 9.28219  | 6.40382  | 13.6467 |
| SNU-178 | 907262 stomach                          | carcinoma                  | digestive_system  | stomach            | 0.840206 | 1.01028  | 0.092930 | 3.744255  | 5.404777 | 6.40382  | 7.824729 | 0.86875  | 0.0042   | 13.6467  | 3.80981  | 5.404777 | 9.28219  | 6.40382  | 13.6467 |
| SNU-178 | 907262 stomach                          | carcinoma                  | digestive_system  | stomach            | 0.840206 | 1.01028  | 0.092930 | 3.744255  | 5.404777 | 6.40382  | 7.824729 | 0.86875  | 0.0042   | 1        |          |          |          |          |         |



|         |                        |                  |                  |          |          |          |           |          |          |          |          |        |          |          |          |           |
|---------|------------------------|------------------|------------------|----------|----------|----------|-----------|----------|----------|----------|----------|--------|----------|----------|----------|-----------|
| NI13    | 949177 autonomic_angle | neuroblastoma    | neuroblastoma    | 0.994992 | 1.351386 | 0.177516 | 0.948451  | 2.001488 | 2.541268 | 3.365362 | 0.657344 | 0.0576 | 1.009100 | 1.348108 | 2.001488 | 4.4154399 |
| NI14    | 949178 autonomic_angle | neuroblastoma    | neuroblastoma    | 1.082365 | 1.546779 | 0.088971 | 0.792158  | 1.67952  | 2.110963 | 2.82384  | 0.824974 | 0.0044 | 1.035716 | 1.211995 | 1.67952  | 3.473759  |
| NI1     | 949179 autonomic_angle | neuroblastoma    | neuroblastoma    | 0.90041  | 1.027777 | 0.076179 | 1.249209  | 2.406666 | 3.553699 | 4.780512 | 0.890011 | 0.0019 | 1.031711 | 2.107549 | 2.406666 | 2.917587  |
| NI-1    | 971773 soft_tissue     | rhabdomyosarcoma | rhabdomyosarcoma | 1.011586 | 1.096424 | 0.163109 | -0.436677 | 0.603174 | 1.628699 | 2.660016 | 0.726213 | 0.0075 | 1.009125 | 1.009867 | 0.603174 | 1.100645  |
| NI-2    | 971774 soft_tissue     | rhabdomyosarcoma | rhabdomyosarcoma | 0.828173 | 0.944815 | 0.137793 | -0.395025 | 2.376381 | 4.309384 | 6.063329 | 0.833392 | 0.0043 | 1.009126 | 1.666868 | 2.376381 | 3.628945  |
| NI2-VML | 971777 skin            | melanoma         | melanoma         | 0.973125 | 1.297980 | 0.180202 | 1.320262  | 2.401224 | 2.969373 | 3.073174 | 0.501709 | 0.0082 | 1.009188 | 1.600804 | 2.401224 | 4.21125   |
