# Supplementary material for: LIM kinase inhibitors disrupt mitotic microtubule organization and impair tumor cell proliferation
Source: PubMed Central journal article supplement (PMC4770715; doi:10.18632/oncotarget.6288), 2015-11-03
Supplement: oncotarget-06-38469-s010.pdf [file oncotarget-06-38469-s010.pdf]

| drug name  | tissue name                        | ttest p value | ttest effect size | group mean | mut | ttest q value |
|------------|------------------------------------|---------------|-------------------|------------|-----|---------------|
| CRT0105446 | B_cell_leukemia                    | 0.0132944     | 1.29817           | 6.7572     | 7   | 0.181907      |
| CRT0105446 | B_cell_lymphoma                    | 0.000212202   | 1.62401           | 7.07214    | 10  | 0.00987567    |
| CRT0105446 | Bladder                            | 0.215701      | -0.409016         | 5.07509    | 18  | 0.692213      |
| CRT0105446 | Burkitt_lymphoma                   | 0.00162662    | 1.38358           | 6.83537    | 10  | 0.0452533     |
| CRT0105446 | Hodgkin_lymphoma                   | 0.138732      | 0.839126          | 6.30434    | 6   | 0.596773      |
| CRT0105446 | Myeloma                            | 0.0152532     | 1.27234           | 6.73165    | 7   | 0.197932      |
| CRT0105446 | T_cell_leukemia                    | 0.724764      | -0.487337         | 4.98629    | 1   | 0.936995      |
| CRT0105446 | acute_myeloid_leukaemia            | 0.000740992   | 1.14178           | 6.58507    | 17  | 0.0258638     |
| CRT0105446 | adrenal_gland                      | 0.292         | 1.45793           | 6.92859    | 1   | 0.754709      |
| CRT0105446 | anaplastic_large_cell_lymphoma     | 0.946918      | 0.0921545         | 5.5649     | 1   | 0.988023      |
| CRT0105446 | biliary_tract                      | 0.725513      | -0.217992         | 5.25655    | 5   | 0.936945      |
| CRT0105446 | bone_other                         | 0.865618      | 0.234234          | 5.70676    | 1   | 0.968037      |
| CRT0105446 | breast                             | 0.954678      | 0.0129787         | 5.48509    | 39  | 0.989638      |
| CRT0105446 | cervix                             | 0.939355      | -0.0306583        | 5.44279    | 12  | 0.986137      |
| CRT0105446 | chondrosarcoma                     | 0.882825      | -0.204008         | 5.26919    | 1   | 0.97195       |
| CRT0105446 | chronic_myeloid_leukaemia          | 0.28879       | 0.55728           | 6.02422    | 7   | 0.753385      |
| CRT0105446 | digestive_system_other             | 0.650389      | -0.627281         | 4.84656    | 1   | 0.915458      |
| CRT0105446 | endometrium                        | 0.975107      | 0.014486          | 5.48717    | 9   | 0.994452      |
| CRT0105446 | ewings_sarcoma                     | 0.461166      | -0.243554         | 5.23601    | 18  | 0.846438      |
| CRT0105446 | fibrosarcoma                       | 0.934066      | -0.0810335        | 5.3921     | 2   | 0.985388      |
| CRT0105446 | glioma                             | 0.0287777     | -0.466271         | 5.0386     | 45  | 0.281772      |
| CRT0105446 | haematopoietic_neoplasm_other      | 0.103665      | 1.30115           | 6.76808    | 3   | 0.532404      |
| CRT0105446 | hairy_cell_leukaemia               | 0.911511      | -0.088947         | 5.38434    | 3   | 0.98076       |
| CRT0105446 | head_and_neck                      | 0.99654       | -0.00124715       | 5.47168    | 24  | 0.999058      |
| CRT0105446 | kidney                             | 0.00069663    | -1.03566          | 4.47038    | 21  | 0.0247742     |
| CRT0105446 | large_intestine                    | 0.0231857     | 0.544459          | 5.9883     | 35  | 0.250557      |
| CRT0105446 | leukemia                           | 0.990395      | -0.00963534       | 5.46329    | 3   | 0.997406      |
| CRT0105446 | liver                              | 0.114227      | -0.829342         | 4.65239    | 7   | 0.555132      |
| CRT0105446 | lung_NSCLC_adenocarcinoma          | 0.453254      | 0.1526            | 5.61385    | 50  | 0.842236      |
| CRT0105446 | lung_NSCLC_carcinoid               | 0.762105      | -0.242276         | 5.23172    | 3   | 0.946169      |
| CRT0105446 | lung_NSCLC_large_cell              | 0.511952      | 0.254056          | 5.72191    | 13  | 0.865939      |
| CRT0105446 | lung_NSCLC_not_specified           | 0.363884      | 0.563605          | 6.03219    | 5   | 0.798595      |
| CRT0105446 | lung_NSCLC_squamous_cell_carcinoma | 0.14753       | 0.712012          | 6.17621    | 8   | 0.609689      |
| CRT0105446 | lung_small_cell_carcinoma          | 0.173032      | 0.336389          | 5.79235    | 33  | 0.644219      |
| CRT0105446 | lymphoblastic_T_cell_leukaemia     | 0.0495453     | 0.910343          | 6.37074    | 9   | 0.373788      |
| CRT0105446 | lymphoblastic_leukemia             | 0.106188      | 0.711348          | 6.17339    | 10  | 0.539962      |
| CRT0105446 | lymphoid_neoplasm_other            | 0.0615463     | 0.981277          | 6.44369    | 7   | 0.415167      |
| CRT0105446 | medulloblastoma                    | 0.681249      | 0.284913          | 5.75606    | 4   | 0.924269      |
| CRT0105446 | melanoma                           | 1.81E-08      | -1.24085          | 4.30959    | 41  | 4.98E-06      |
| CRT0105446 | mesothelioma                       | 0.982929      | -0.0121376        | 5.46086    | 6   | 0.995561      |
| CRT0105446 | neuroblastoma                      | 0.000420535   | -0.954163         | 4.55799    | 27  | 0.0167165     |
| CRT0105446 | oesophagus                         | 0.838971      | 0.0596594         | 5.53045    | 23  | 0.963681      |
| CRT0105446 | osteosarcoma                       | 0.709737      | -0.172782         | 5.30247    | 9   | 0.93249       |
| CRT0105446 | ovary                              | 0.980786      | 0.00775504        | 5.48042    | 19  | 0.99562       |
| CRT0105446 | pancreas                           | 0.0813102     | 0.591776          | 6.04933    | 17  | 0.478303      |
| CRT0105446 | prostate                           | 0.849002      | 0.118215          | 5.5902     | 5   | 0.965738      |
| CRT0105446 | rhabdomyosarcoma                   | 0.0163966     | -1.35838          | 4.12692    | 6   | 0.207184      |
| CRT0105446 | skin_other                         | 0.160399      | -1.12265          | 4.35537    | 3   | 0.628319      |
| CRT0105446 | soft_tissue_other                  | 0.0832915     | -0.851135         | 4.63213    | 8   | 0.484913      |
| CRT0105446 | stomach                            | 0.796682      | 0.087567          | 5.55818    | 17  | 0.954212      |

|            |                         |           |           |         |    |          |
|------------|-------------------------|-----------|-----------|---------|----|----------|
| CRT0105446 | testis                  | 0.404281  | -0.816681 | 4.65869 | 2  | 0.819138 |
| CRT0105446 | thyroid                 | 0.0182628 | -0.949085 | 4.54116 | 12 | 0.220068 |
| CRT0105446 | urogenital_system_other | 0.245061  | 0.805926  | 6.2739  | 4  | 0.719188 |
| CRT0105446 | uterus                  | 0.258458  | -1.56339  | 3.91187 | 1  | 0.730634 |
