# Supplementary material for: LIM kinase inhibitors disrupt mitotic microtubule organization and impair tumor cell proliferation
Source: PubMed Central journal article supplement (PMC4770715; doi:10.18632/oncotarget.6288), 2015-11-03
Supplement: oncotarget-06-38469-s011.pdf [file oncotarget-06-38469-s011.pdf]

| drug name  | tissue name                        | ttest p value | ttest effect size | group mean | mut | ttest q value |
|------------|------------------------------------|---------------|-------------------|------------|-----|---------------|
| CRT0105950 | B_cell_leukemia                    | 0.536063      | 0.377715          | 3.33027    | 7   | 0.875302      |
| CRT0105950 | B_cell_lymphoma                    | 0.000775579   | 1.71352           | 4.64399    | 10  | 0.0267817     |
| CRT0105950 | Bladder                            | 0.395385      | -0.326259         | 2.63928    | 18  | 0.815207      |
| CRT0105950 | Burkitt_lymphoma                   | 1.79E-05      | 2.18071           | 5.10406    | 10  | 0.00148958    |
| CRT0105950 | Hodgkin_lymphoma                   | 0.00759251    | 1.75432           | 4.69486    | 6   | 0.13099       |
| CRT0105950 | Myeloma                            | 0.0880398     | 1.04027           | 3.98576    | 7   | 0.498694      |
| CRT0105950 | T_cell_leukemia                    | 0.971877      | 0.0566838         | 3.01319    | 1   | 0.994027      |
| CRT0105950 | acute_myeloid_leukaemia            | 0.215928      | -0.488266         | 2.48098    | 17  | 0.69206       |
| CRT0105950 | adrenal_gland                      | 0.411681      | -1.31961          | 1.63899    | 1   | 0.823871      |
| CRT0105950 | anaplastic_large_cell_lymphoma     | 0.968958      | 0.0625688         | 3.01906    | 1   | 0.993783      |
| CRT0105950 | biliary_tract                      | 0.348646      | 0.675748          | 3.62719    | 5   | 0.790227      |
| CRT0105950 | bone_other                         | 0.955621      | -0.089475         | 2.86725    | 1   | 0.989527      |
| CRT0105950 | breast                             | 0.0102747     | 0.679092          | 3.59531    | 39  | 0.156494      |
| CRT0105950 | cervix                             | 0.321668      | 0.463722          | 3.41183    | 12  | 0.776301      |
| CRT0105950 | chondrosarcoma                     | 0.137438      | -2.38628          | 0.573948   | 1   | 0.596543      |
| CRT0105950 | chronic_myeloid_leukaemia          | 0.152281      | -0.873275         | 2.09263    | 7   | 0.616374      |
| CRT0105950 | digestive_system_other             | 0.412135      | -1.31832          | 1.64027    | 1   | 0.824125      |
| CRT0105950 | endometrium                        | 0.67438       | 0.226549          | 3.18003    | 9   | 0.922419      |
| CRT0105950 | ewings_sarcoma                     | 0.00593265    | -1.05349          | 1.93201    | 18  | 0.109897      |
| CRT0105950 | fibrosarcoma                       | 0.89876       | -0.144757         | 2.81227    | 2   | 0.976377      |
| CRT0105950 | glioma                             | 0.654459      | -0.111064         | 2.85314    | 45  | 0.916623      |
| CRT0105950 | haematopoietic_neoplasm_other      | 0.0579561     | -1.76034          | 1.2043     | 3   | 0.405836      |
| CRT0105950 | hairy_cell_leukaemia               | 0.90221       | 0.114233          | 3.0703     | 3   | 0.977635      |
| CRT0105950 | head_and_neck                      | 0.568171      | -0.190674         | 2.77289    | 24  | 0.88688       |
| CRT0105950 | kidney                             | 0.0381735     | -0.737483         | 2.24271    | 21  | 0.325569      |
| CRT0105950 | large_intestine                    | 0.188863      | 0.366503          | 3.30354    | 35  | 0.665684      |
| CRT0105950 | leukemia                           | 0.00141928    | -2.95491          | 0.0151873  | 3   | 0.0408413     |
| CRT0105950 | liver                              | 0.559123      | 0.356581          | 3.30936    | 7   | 0.88324       |
| CRT0105950 | lung_NSCLC_adenocarcinoma          | 0.526063      | 0.14986           | 3.09503    | 50  | 0.872324      |
| CRT0105950 | lung_NSCLC_carcinoid               | 0.377515      | 0.820212          | 3.77305    | 3   | 0.805911      |
| CRT0105950 | lung_NSCLC_large_cell              | 0.305085      | 0.46141           | 3.40885    | 13  | 0.765099      |
| CRT0105950 | lung_NSCLC_not_specified           | 0.957694      | 0.0382613         | 2.99456    | 5   | 0.990222      |
| CRT0105950 | lung_NSCLC_squamous_cell_carcinoma | 0.267404      | 0.633554          | 3.58242    | 8   | 0.736322      |
| CRT0105950 | lung_small_cell_carcinoma          | 0.0936846     | 0.480554          | 3.41297    | 33  | 0.509488      |
| CRT0105950 | lymphoblastic_T_cell_leukaemia     | 0.968836      | -0.0210676        | 2.93581    | 9   | 0.993793      |
| CRT0105950 | lymphoblastic_leukemia             | 0.00983136    | -1.31841          | 1.65828    | 10  | 0.153039      |
| CRT0105950 | lymphoid_neoplasm_other            | 0.784903      | -0.166626         | 2.79174    | 7   | 0.952717      |
| CRT0105950 | medulloblastoma                    | 0.563291      | -0.465644         | 2.49378    | 4   | 0.885127      |
| CRT0105950 | melanoma                           | 0.0803235     | -0.452659         | 2.53222    | 41  | 0.474845      |
| CRT0105950 | mesothelioma                       | 0.841457      | 0.131802          | 3.08718    | 6   | 0.96404       |
| CRT0105950 | neuroblastoma                      | 1.39E-05      | -1.36205          | 1.6506     | 27  | 0.00124162    |
| CRT0105950 | oesophagus                         | 0.00971934    | 0.879551          | 3.8053     | 23  | 0.151923      |
| CRT0105950 | osteosarcoma                       | 0.0308612     | -1.1621           | 1.81044    | 9   | 0.292058      |
| CRT0105950 | ovary                              | 0.753299      | 0.117554          | 3.07074    | 19  | 0.943784      |
| CRT0105950 | pancreas                           | 0.131989      | 0.594192          | 3.53538    | 17  | 0.586852      |
| CRT0105950 | prostate                           | 0.631772      | -0.345621         | 2.6136     | 5   | 0.909111      |
| CRT0105950 | rhabdomyosarcoma                   | 0.014874      | -1.60112          | 1.37011    | 6   | 0.194688      |
| CRT0105950 | skin_other                         | 0.80415       | 0.230545          | 3.18608    | 3   | 0.956622      |
| CRT0105950 | soft_tissue_other                  | 0.0238252     | -1.28908          | 1.68323    | 8   | 0.254308      |
| CRT0105950 | stomach                            | 0.0193567     | 0.921375          | 3.85409    | 17  | 0.226609      |

|                                    |          |            |          |    |          |
|------------------------------------|----------|------------|----------|----|----------|
| CRT0105950 testis                  | 0.034808 | -2.39731   | 0.566584 | 2  | 0.310812 |
| CRT0105950 thyroid                 | 0.230294 | -0.561216  | 2.40564  | 12 | 0.704937 |
| CRT0105950 urogenital_system_other | 0.942686 | -0.0579298 | 2.89901  | 4  | 0.986795 |
| CRT0105950 uterus                  | 0.601787 | 0.83894    | 3.79425  | 1  | 0.899498 |
